# Supplementary material for: Photomediated asymmetric synthesis of (–)-cupareneElectronic supplementary information (ESI) available: experimental procedures and data including copies of 1H-NMR and 13C-NMR spectra for all new compounds, and NOESY spectra for compounds 9, 10, 11, 15 and 16. See http://www.rsc.org/suppdata/cc/b3/b300815k/
Source: Royal Society of Chemistry journal article supplement (doi:10.1039/b300815k), 2003-03-31

## General experimental

Infra-red spectra were recorded on a Perkin-Elmer Paragon 1000 Fourier transform I.R. spectrometer.

NMR spectra were recorded using a Bruker AM360 or AM400 spectrometer in deuteriochloroform, unless otherwise stated, referenced to TMS ( $\delta$  0). Chemical shifts are in parts per million ( $\delta$  ppm). Coupling constants are in Hertz (J Hz). The following abbreviations are used: s-singlet, d-doublet, dd-double doublet, t-triplet, q-quartet, m-multiplet.

Mass spectra were recorded on a Jeol AX505W spectrometer (EI) and Kratos MS890 (FAB).

Products were isolated by flash chromatography using Merck silica gel 60 (4063  $\mu\text{m}$ ).<sup>1</sup> Analytical t.l.c was carried out on Merck (aluminium sheets) silica gel 60 F<sub>254</sub> plates using short wave (254 nm) UV light, KMnO<sub>4</sub> or anisaldehyde to visualise components.

Irradiations were carried out under an argon atmosphere using an immersion well reactor (model RQ125 and RQ400, Photochemical Reactors Limited) and monitored by t.l.c.

Microwave experiments were carried out using sealed tubes in a CEM Discover microwave reactor.

Dichloromethane was freshly distilled from calcium hydride. Tetrahydrofuran was freshly distilled from sodium and benzophenone. Pyrrolidine was distilled from calcium hydride and stored over pellets of potassium hydroxide. *m*-CPBA was purified by dissolving in diethyl ether and then washing three times with a phosphate buffer solution. The solvent was carefully removed *in-vacuo* to give pure *m*-CPBA. All other reagents were used as received.

---

<sup>1</sup> W. C. Still, M. Kahn, A. Mitra, *J. Org. Chem.*, 1978, **43**, 2923.

## 2-Methyl-1-*p*-tolyl-propan-1-one (5).

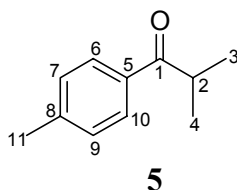

To powdered  $\text{AlCl}_3$  (30.8 g, 224.99 mmol) in a 500 mL, three neck round bottom flask equipped with an argon inlet, magnetic stirrer, double face condenser, pressure equalising dropping funnel and a HCl gas outlet bubbling into water, was added toluene (67 mL, 629.96 mmol). Isobutyryl chloride (18.8 mL, 179.99 mmol) was then added dropwise to the yellow solution over a period of 30 minutes. Once the addition was complete the reaction mixture was heated to  $60^\circ\text{C}$  for 3 hours. The resulting dark green/black mixture was then poured into water (400 mL) and ice. The organic phase was separated from the aqueous and the aqueous was extracted with ether (x3). The combined organic layers were washed with NaOH (x2, 10%), water (x1), brine (x1), dried over magnesium sulphate and concentrated under reduced pressure to give the crude product as an orange/brown oil. Fractional distillation through a vigreux column under water pump pressure afforded the title compound as a colourless oil (28.7g, 98%);  $\nu_{\text{max}}$  (neat)/ $\text{cm}^{-1}$  3029 (m), 2972 (m), 2932 (m), 2872 (m), 2360 (m), 1678 (s), 1607 (s), 1223 (s), 1161 (m), 977 (m), 830 (m);  $\delta_{\text{H}}$  (360 MHz,  $\text{CDCl}_3$ ) 7.87 (2H, d,  $J$  8.0, 6, 10-H), 7.27 (2H, d,  $J$  8.0, 7, 9-H), 3.56 (1H, m, 2-H), 2.20 (3H, s, 11-H), 1.21 (6H, d,  $J$  6.9, 3, 4-H);  $\delta_{\text{C}}$  (90 MHz,  $\text{CDCl}_3$ ) 204.1 (1-C), 143.5 (5-C), 133.7 (8-C), 129.3 (6, 10-C), 128.4 (7, 9-C), 35.2 (2-C), 21.6 (11-C), 19.2 (3, 4-C);  $m/z$  (EI) 162 ( $\text{M}^+$ ; 12), 119 (100), 105 (14.9), 91 (22%). All spectral data matched that reported in the literature.<sup>2</sup>

<sup>2</sup> A. R. Katritzky, W. Kuzmierkiewicz, *J. Chem. Soc., Perkin Trans. 1.*, 1987, 819-823.

#### 4,4-Dimethyl-5-oxo-5-*p*-tolyl-pentane nitrile.

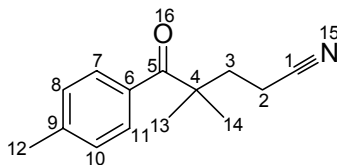

Acrylonitrile (1.72 g, 32.4 mmol) was added dropwise over 5 minutes to a stirred mixture of 2-methyl-1-*p*-tolyl-propan-1-one (4.8 g, 29.63 mmol), 1,4 dioxane (5 mL) and benzyltrimethylammonium hydroxide (40% w/w, 1.25 g, 2.99 mmol) kept at 30-35°C. The mixture was stirred for a further 18 hours, then acidified using hydrochloric acid, diluted with water and extracted with chloroform (x4). The combined organic extract were freed from dioxane by washing with water, and then dried over magnesium sulphate. The organic phase was concentrated under reduced pressure to give the crude product as a yellow oil. The residue was purified by column chromatography (hexane/diethyl ether 4:1) to afford the title compound as a colourless oil (4.33 g, 68%);  $R_f$  0.27 (hexane/diethyl ether 4:1);  $\nu_{\max}$  (neat)/ $\text{cm}^{-1}$  2971 (s), 2875 (m), 2246 (s, nitrile), 1669 (s, C=O), 961 (s), 835 (m);  $\delta_H$  (360 MHz,  $\text{CDCl}_3$ ) 7.65 (2H, d,  $J$  8.2, 7, 11-H), 7.24 (2H, d,  $J$  8.2, 8, 10-H), 2.39 (3H, s, 12-H), 2.31 (2H, dd,  $J$  9.0 and 8.9, 2-H), 2.14 (2H, dd,  $J$  9.0 and 8.9, 3-H), 1.39 (3H, s, 13, 14-H);  $\delta_C$  (90 MHz,  $\text{CDCl}_3$ ) 206.4 (5-C), 142.8 (6-C), 135.2 (9-C), 129.4 (7, 11-C), 128.6 (8, 10-C), 120.3 (1-C), 47.3 (4-C), 37.0 (3-C), 26.3 (13, 14-C), 21.9 (12-C), 13.5 (3-C);  $m/z$  (FAB) 216 ( $[\text{M}+\text{H}]^+$ ; 46), 161 (5), 119 (100%); HRMS  $m/z$  (FAB) calculated for  $\text{C}_{14}\text{H}_{18}\text{NO}$ , 216.1388 ( $[\text{M}+\text{H}]^+$ ), found 216.1394.

#### 4,4-Dimethyl-5-*p*-tolyl-hex-5-enitrile (7).

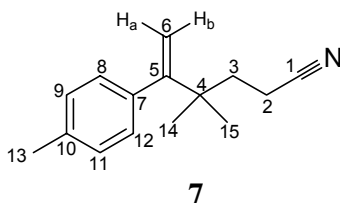

Potassium tert-butoxide (0.77 g, 6.89 mmol), methyltriphenylphosphonium bromide (2.46 g, 6.89 mmol) and toluene (30 mL) were placed in a 100 mL two neck round bottom flask, fitted with a condenser and under an argon atmosphere. The mixture was refluxed with stirring for 2 hours at which point it became bright yellow. To this was added a solution of 4,4-dimethyl-5-oxo-5-*p*-tolyl-pentane nitrile (1.14 g, 5.3 mmol) in toluene (5 mL) dropwise at  $\sim 35^{\circ}\text{C}$ . The resulting brown/orange mixture was then refluxed for a further 6 hours and then left to stir overnight at  $40^{\circ}\text{C}$  for 18 hours. The reaction mixture was diluted with diethyl ether (20 mL) and water (10 mL), stirred for a further 5 minutes and the organic layer was separated from the aqueous. The aqueous layer was washed with diethyl ether (10 mL x2) and the combined organic layers were dried over magnesium sulphate and rotary evaporated to give a yellow oil. The crude product was purified by flash column chromatography (diethyl ether/hexane 1:4) to afford the title compound as a colourless oil (0.7 g, 62%);  $R_f$  0.23 (diethyl ether/hexane 1:4);  $\nu_{\text{max}}$  (neat)/ $\text{cm}^{-1}$  2969 (s), 2873 (m), 2246 (s, nitrile), 1626 (m, C=C), 1512 (s), 1384 (s), 911 (s), 826 (s);  $\delta_{\text{H}}$  (360 MHz,  $\text{CDCl}_3$ ) 7.12 (2H, d,  $J$  8.0, 8, 12-H), 6.98 (2H, d,  $J$  8.0, 9, 11-H), 5.16 (1H, d,  $J$  1.2, 6- $\text{H}_a$ ), 4.96 (1H, d,  $J$  1.1, 6- $\text{H}_b$ ), 2.35 (3H, s, 13-H), 2.33 (2H, dd,  $J$  9.8 and 8.3, 2-H), 1.78 (2H, dd,  $J$  8.3 and 9.8, 3-H), 1.13 (6-H, s, 14, 15-H);  $\delta_{\text{C}}$  (90 MHz,  $\text{CDCl}_3$ ) 155.8 (5-C), 139.5 (7-C), 136.9 (10-C), 128.9 (8, 12-C), 128.8 (9, 11-C), 120.8 (1-C), 115.5 (6-C), 39.5 (4-C), 36.5 (2-C), 27.6 (14, 15-C), 21.5 (13-C), 13.3 (3-C);  $m/z$  (FAB) 214 ( $[\text{M}+\text{H}]^+$ ; 100), 159 (25), 119 (79), 105 (85%); HRMS  $m/z$  (FAB) calculated for  $\text{C}_{15}\text{H}_{20}\text{NO}$ , 214.1596 ( $[\text{M}+\text{H}]^+$ ), found 214.1604.

**1-(4,4-Dimethyl-5-*p*-tolyl-hex-5-enyl)-pyrrolidine (8).**

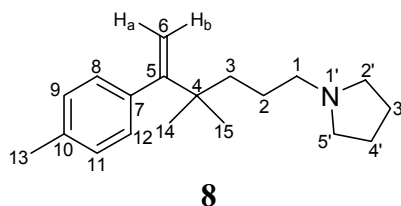

Method 1: To a solution of alkyl bromide **6**<sup>3</sup> (1 g, 3.56 mmol) in absolute ethanol (10 mL) was sequentially added pyrrolidine (386  $\mu$ L, 4.62 mmol) and anhydrous sodium carbonate (3.77 g, 35.6 mmol). The resulting suspension was refluxed for 4 days. The reaction mixture was diluted with EtOAc, filtered, concentrated in vacuo and finally purified by flash column chromatography on silica gel (triethylamine/hexane 1:95) to afford compound **8** (0.91 g, 95%) as a colourless oil.

Method 2: In an oven dried, 25 mL single necked round bottom flask fitted with a condenser and under an argon atmosphere was added 4,4-dimethyl-5-*p*-tolyl-hex-5-enenitrile **7** (0.523 g, 2.46 mmol) and copper (I) chloride (0.27 g, 2.73 mmol). To this was then added a solution of pyrrolidine (306  $\mu$ L, 3.69 mmol) in ethanol (10 mL) and the resulting green/brown mixture was then refluxed for 24 hours. The dark brown/red mixture was then cooled down to room temperature and poured with vigorous stirring into a Erlenmeyer flask (100 mL) containing aqueous NaOH (10 mL, 30%) and diethyl ether (20 mL). The mixture was stirred vigorously for 5 minutes. The organic layer was then separated and the aqueous layer was extracted with diethyl ether (x3). The combined organic extracts were dried over magnesium sulphate and rotary evaporated to afford the crude amidine - 4,4-dimethyl-1-pyrrolidine-1-yl-5-*p*-tolyl-hex-5-enylideneamine as a brown oil (0.69 g).

The crude amidine (0.69 g, 2.43 mmol) was then transferred to an oven dried 25 mL two neck round bottom flask, equipped with a magnetic stirrer bar and under an argon atmosphere. To this was then added ethanol (10 mL) via syringe and the reaction mixture cooled to 0°C. Sodium borohydride (0.11 g, 2.95 mmol) was then added with stirring in small portions. The solution was then left to stir at room temperature for 12 hours. Upon completion the mixture was poured into an Erlenmeyer flask (100 mL)

containing NaOH (10 mL, 30%) and diethyl ether (20 mL). The organic layer was separated and the aqueous layer was extracted with diethyl ether (x3). The combined organic extracts were dried over magnesium sulphate, filtered and solvent removed under reduced pressure. The residue (dark brown oil) was purified by column chromatography (hexane/triethylamine 95:5) to afford the title compound **8** (0.56 g, 84%) as a colourless oil;  $R_f$  0.45 (hexane/triethylamine 95:5);  $\nu_{\max}$  (neat)/ $\text{cm}^{-1}$  2964 (s), 2873 (m), 2785 (s), 1625 (m, C=C), 1511 (m), 1449 (s), 1380 (s), 904 (s), 835 (s);  $\delta_{\text{H}}$  (360 MHz,  $\text{CDCl}_3$ ) 7.09 (2H, d,  $J$  7.9, 8, 12-H), 7.02 (2H, d,  $J$  8.1, 9, 11-H), 5.11 (1H, d,  $J$  1.7, 6- $\text{H}_a$ ), 4.84 (1H, d,  $J$  1.7, 6- $\text{H}_b$ ), 2.51-2.46 (4H, m, 2', 5'-H), 2.38 (2H, d,  $J$  7.8, 1-H), 2.34 (3H, s, 13-H), 1.79-1.75 (4H, m, 3', 4'-H), 1.58-1.49 (2H, m, 2-H), 1.35-1.30 (2H, m, 3-H), 1.08 (6H, s, 14, 15-H);  $\delta_{\text{C}}$  (90 MHz,  $\text{CDCl}_3$ ) 157.9 (5-C), 140.9 (7-C), 136.2 (10-C), 129.1 (8, 12-C), 128.4 (9, 11-C), 113.8 (6-C), 57.6 (1-C), 54.7 (2', 5'-C), 39.5 (4-C), 39.1 (2-C), 28.2 (14, 15-C), 24.9 (3-C), 23.8 (3', 4'-C), 21.5 (13-C);  $m/z$  (EI) 271 ( $\text{M}^+$ , 30), 256 (13), 200 (16), 152 (20), 143 (23), 110 (80), 84 (100%); HRMS  $m/z$  (EI) calculated for  $\text{C}_{19}\text{H}_{29}\text{N}$ , 271.22999 ( $\text{M}^+$ ), found 271.2295.

---

<sup>3</sup> A. Srikrishna, G. Sundarababu, *Tetrahedron*, 1991, **47**, 481-496.

**(1*RS*, 2*SR*)-1-(2,3,3-Trimethyl-2-*p*-tolyl-cyclopentyl)-pyrrolidine (9) and (1*SR*, 2*SR*)-1-(2,3,3-Trimethyl-2-*p*-tolyl-cyclopentyl)-pyrrolidine (10).**

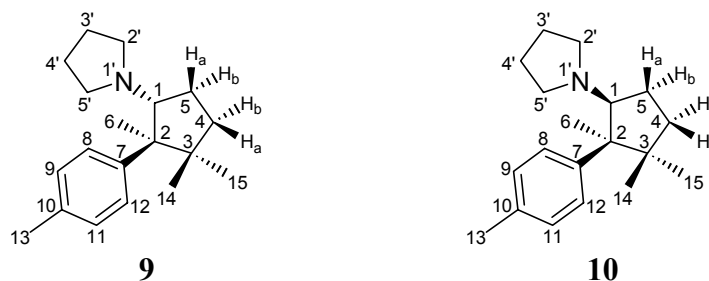

A hexane solution (280 mL, 0.005M) of styryl amine 1-(4,4-dimethyl-5-*p*-tolyl-hex-5-enyl)-pyrrolidine **8** (350 mg, 1.29 mmol) was placed in a quartz vessel and purged with argon for 1 hour. The solution was then irradiated with a medium pressure 400W mercury lamp for 50 minutes. NMR analysis of the irradiated sample showed 100% conversion and the formation of two products **9** and **10** in a 6:1 ratio respectively. After removal of the solvent under reduced pressure, the residue, a deep yellow oil, was chromatographed on silica gel (hexane/diethyl ether 1:1 or hexane/diethyl amine 19:1) to afford diastereomers **9** (215 mg, 62%) and **10** (25 mg, 7%) as pale yellow oils.

Data for **9**:  $R_f$  0.50 (hexane/diethyl amine 19:1);  $\nu_{\max}$  (neat)/ $\text{cm}^{-1}$  2957 (s, C-H), 2786 (m), 1515 (m), 1469 (m), 1112 (w), 811 (m);  $\delta_{\text{H}}$  (360 MHz,  $\text{CDCl}_3$ ) 7.26 (2H, d,  $J$  8.3, 8, 12-H), 6.99 (2H, d,  $J$  8.1, 9, 11-H), 3.39 (1H, t,  $J$  8.1, 1-H), 2.27-2.20 (2H, m, 2' or 5'-H), 2.25 (3H, s, 13-H), 2.19-2.06 (2H, m, 2' or 5'-H), 2.05-1.98 (1H, m, 5- $\text{H}_a$  or 5- $\text{H}_b$ ), 1.78-1.68 (2H, m, 5- $\text{H}_a$  or 5- $\text{H}_b$  and 4 $\text{H}_a$  or 4- $\text{H}_b$ ), 1.60-1.49 (4H, m, 3', 4'-H), 1.47-1.43 (1H, m, 4- $\text{H}_a$  or 4- $\text{H}_b$ ), 1.29 (3H, s, 6-H), 0.70 (3H, s, 15-H), 0.62 (3H, s, 14-H);  $\delta_{\text{C}}$  (90 MHz,  $\text{CDCl}_3$ ) 141.9 (7-C), 135.7 (10-C), 128.6 (8, 12-C), 128.4 (9, 11-C), 70.2 (1-C), 55.1 (2', 5'-C), 53.8 (2-C), 46.2 (3-C), 38.4 (4-C), 29.3 (5-C), 28.9 (14-C), 24.4 (15-C), 23.9 (3', 4'-C), 21.8 (13-C), 17.3 (6-C);  $m/z$  (EI) 271 ( $\text{M}^+$ , 12), 205 (10), 159 (5), 129 (30), 111 (12), 110 (100), 96 (11%); HRMS  $m/z$  (EI) calculated for  $\text{C}_{19}\text{H}_{29}\text{N}$ , 271.23001 ( $\text{M}^+$ ), found 271.22939.

Data for **10**:  $R_f$  0.52 (hexane/diethyl amine 19:1);  $\nu_{\max}$  (neat)/ $\text{cm}^{-1}$  2968 (s, C-H), 2873 (w), 2778 (m), 1515 (m), 1458 (m), 1085 (m);  $\delta_{\text{H}}$  (360 MHz,  $\text{CDCl}_3$ ) 7.34 (2H, d,  $J$

8.3, 8, 12-H), 7.01 (2H, d, *J* 8.1, 9, 11-H), 2.75 (1H, dd, *J* 6.7 and 10.2, 1-H), 2.49-2.36 (2H, m, 2' or 5'-H), 2.30 (3H, s, 13-H), 2.24-2.18 (1H, m, 5-H<sub>a</sub> or 5-H<sub>b</sub>), 2.17-2.07 (2H, m, 2' or 5'-H), 1.95-1.89 (1H, m, 4-H<sub>a</sub> or 4-H<sub>b</sub> or 5-H<sub>a</sub> or 5-H<sub>b</sub>), 1.78-1.69 (1H, m, 4-H<sub>a</sub> or 4-H<sub>b</sub> or 5-H<sub>a</sub> or 5-H<sub>b</sub>), 1.59-1.47 (5H, m, 3', 4'-H and 4-H<sub>a</sub> or 4-H<sub>b</sub> or 5-H<sub>a</sub> or 5-H<sub>b</sub>), 1.01 (3H, s, 15-H), 0.40 (3H, s, 14-H);  $\delta_C$  (90 MHz, CDCl<sub>3</sub>) 139.3 (7-C), 132.4 (10-C), 127.3 (8, 12-C), 125.1 (9, 11-C), 74.9 (1-C), 51.8 (2', 5'-C), 51.3 (2-C), 44.7 (3-C), 35.8 (4 or 5-C), 29.5 (5 or 4-C), 23.9 (15-C), 23.1 (14-C), 22.7 (6-C), 21.3 (3', 4'-C), 19.1 (13-C); *m/z* (EI) 271 ( $M^+$ , 11), 111 (11), 110 (100), 96 (11%); HRMS *m/z* (EI), calculated for C<sub>19</sub>H<sub>29</sub>N, 271.23001 ( $M^+$ ), found 271.22944.



**(1*RS*, 2*SR*)-1-(2,3,3-Trimethyl-2-*p*-tolyl-cyclopentyl)-pyrrolidine-1'-oxide (11).**

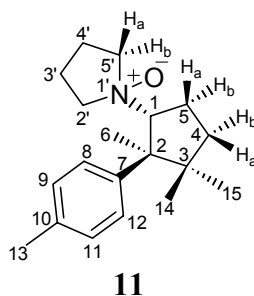

To (1*RS*, 2*SR*)-1-(2,3,3-trimethyl-2-*p*-tolyl-cyclopentyl)-pyrrolidine **9** (213 mg, 0.79 mmol) dissolved in dichloromethane (5 mL) at 0 °C was added dropwise a solution of *m*-chloroperbenzoic acid (0.16 g, 0.94 mmol) in dichloromethane (3 mL). Once the addition was complete the reaction mixture was brought to room temperature and stirred for 3 hours. The reaction was then quenched with Na<sub>2</sub>S<sub>2</sub>O<sub>3</sub> (10 mL, 10%) and washed with saturated aqueous NaHCO<sub>3</sub> (3 x 15 mL). The combined organic extracts were dried over magnesium sulphate and the solvent removed in vacuo. The resulting pale brown sticky solid/oil was purified by flash column chromatography (methanol/ethyl acetate 1:1) to yield the pure amine oxide **11** (188 mg, 83%) as a white fluffy sticky solid/oil; R<sub>f</sub> 0.17 (methanol/ethyl acetate 1:1); ν<sub>max</sub> (neat)/cm<sup>-1</sup> 2924 (s), 2854 (m), 1466 (m, N=O), 1381 (w), 812 (w); δ<sub>H</sub> (360 MHz, CDCl<sub>3</sub>) 7.30 (2H, d, *J* 8.5, 8, 12-H), 7.12 (2H, d, *J* 7.9, 9, 11-H), 4.45 (1H, t, *J* 8.9, 1-H), 3.48 (1H, q, *J* 8.5, 5'-H<sub>a</sub> or H<sub>b</sub>), 3.13-3.09 (1H, m, 5'-H<sub>a</sub> or H<sub>b</sub>), 3.01-2.98 (1H, m, 5-H<sub>b</sub>), 2.93-2.88 (2H, m, 3'-H), 2.36-2.29 (2H, m, 3' or 4'-H), 2.33 (3H, s, 13-H), 2.19-2.13 (1H, m, 5-H<sub>a</sub>), 2.02-1.96 (1H, m, 4-H<sub>b</sub>), 1.80-1.74 (2H, m, 3' or 4'-H), 1.74 (3H, s, 6-H), 1.65-1.61 (1H, m, 4-H<sub>a</sub>), 0.79 (3H, s, 15-H), 0.76 (3H, s, 14-H); δ<sub>C</sub> (90 MHz, CDCl<sub>3</sub>) 139.8 (7-C), 136.1 (10-C), 128.0 (8, 9, 11, 12-C), 79.9 (1-C), 71.8 (5'-C), 67.2 (3'-C), 53.8 (2-C), 46.8 (3-C), 37.0 (4-C), 28.1 (14-C), 23.4 (15-C), 22.5 (3' or 4'-C), 22.2 (5-C), 21.2 (13-C), 21.0 (3' or 4'-C), 18.1 (6-C); *m/z* (FAB) 288 ([M+H]<sup>+</sup>, 100), 270 (11), (13), 165 (12), 154 (12), 145 (69%); HRMS *m/z* (FAB) calculated for C<sub>19</sub>H<sub>30</sub>NO, 288.2327 ([M+H]<sup>+</sup>), found 288.2320.

**(1*RS*)-1'-Methyl-4'-(1,5,5-trimethyl-cyclopent-2-enyl)-benzene (12).**

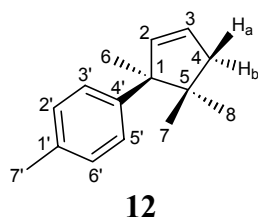

Method 1: To a 25ml flame dried two neck round bottom flask, under an argon atmosphere was added (1*RS*, 2*SR*)-1-(2,3,3-trimethyl-2-*p*-tolyl-cyclopentyl)-pyrrolidine-1'-oxide **11** (28.5 mg, 0.1 mmol) and THF (4 mL). The colourless solution was then heated to 60°C for 18 hours. The resulting pale yellow solution was cooled to 25°C, concentrated in vacuo and chromatographed over silica gel (hexane) to afford the title compound **12** as a colourless oil (8 mg, 40%).

Method 2: (1*RS*, 2*SR*)-1-(2,3,3-Trimethyl-2-*p*-tolyl-cyclopentyl)-pyrrolidine-1'-oxide **11** (8.6 mg, 0.03 mmol) in deuterated DMSO (0.3 mL) was placed in a microwave tube. The colourless solution was then irradiated (100W) in the chamber for 1 minute which raised the temperature from 25°C to 200°C. The resulting dark brown solution was then cooled, diluted with diethyl ether (10 mL) and washed with water (2 x 10 mL). The organic layer was removed and the aqueous was extracted with diethyl ether (3 x 5 mL). The combined organic extracts were washed with brine, dried over magnesium sulphate, filtered and rotary evaporated to give the crude product. Purification by silica gel chromatography (hexane) afforded **12** as a colourless oil (4.3 mg, 72%);  $R_f$  0.79 (hexane);  $\nu_{\max}$  (thin film)/cm<sup>-1</sup> 3052 (m, C-H), 3024 (m), 2969 (s), 2925 (s), 1514 (s), 1456 (s), 810 (m), 722 (m);  $\delta_H$  (360 MHz, DMSO) 7.14 (2H, d, J 8.3, 3', 5'-H), 7.08 (2H, d, J 8.1, 2', 6'-H), 5.86-5.84 (1H, m, 2 or 3-H), 5.81-5.79 (1H, m, 3 or 2-H), 2.34-2.29 (1H, m, 4-H<sub>a</sub> or 4-H<sub>b</sub>), 2.26 (3H, s, 7'-H), 2.18-2.07 (1H, m, 4-H<sub>a</sub> or 4-H<sub>b</sub>), 1.22 (3H, s, 6-H), 1.09 (3H, s, 8-H), 0.38 (3H, s, 7-H);  $\delta_C$  (90 MHz, CDCl<sub>3</sub>) 143.0 (4'-C), 140.6 (2 or 3-C), 135.6 (1'-C), 128.8 (3', 5'-C), 128.8 (2 or 3-C), 127.1 (2', 6'-C), 56.4 (1-C), 47.8 (4-C), 44.8 (5-C), 28.4 (6 or 7 or 8-C), 24.3 (6 or 7 or 8-C), 23.5 (6 or 7 or 8-C), 21.3 (7'-C);  $m/z$  (EI) 201 ([M+H]<sup>+</sup>, 9), 200 (M<sup>+</sup>, 49), 186 (7), 185 (36), 157 (100), 143 (23), 128 (12), 105 (11), 84 (20%); HRMS  $m/z$  (FAB) calculated for C<sub>15</sub>H<sub>20</sub>, 200.15660 (M<sup>+</sup>), found 200.15627.

**(±)-Cuparene.**

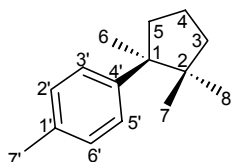

**(±)-Cuparene**

To a solution of 1'-methyl-4'-(1,5,5-trimethyl-cyclopent-2-enyl)-benzene **12** (56 mg, 0.28 mmol) in EtOAc (15 mL) was added 5% Pd on charcoal (20 mg). The mixture was stirred under atmospheric hydrogen for 3 hours. The catalyst was removed by filtration through celite and washed well with EtOAc. The combined filtrate and washings were concentrated in vacuo. The resulting yellow oil was purified by flash column chromatography (hexane) to afford the title compound as a colourless oil (46.5 mg, 82%);  $R_f$  0.66 (hexane);  $\nu_{\max}$  (neat)/ $\text{cm}^{-1}$  3094 (w), 3061 (w), 3025 (w), 2969 (s), 2874 (s), 2727 (w), 1898 (w), 1790 (w), 1516 (s), 1459 (s), 1374 (s), 1193 (m), 1135 (w), 1108 (w), 1020 (m), 812 (s), 724 (m), 547 (s);  $\delta_H$  (360 MHz,  $\text{CDCl}_3$ ) 7.23 (2H, d,  $J$  8.2, 3', 5'-H), 7.08 (2H, d,  $J$  8.1, 2', 6'-H), 2.53-2.45 (1H, m, 5- $H_a$  or  $H_b$ ), 2.31 (3H, s, 7'-H), 1.83-1.64 (4H, m, 3,4-H), 1.61-1.43 (1H, m, 5- $H_a$  or  $H_b$ ), 1.25 (3H, s, 6-H), 1.06 (3H, s, 8-H), 0.56 (3H, s, 7-H);  $\delta_C$  (90 MHz,  $\text{CDCl}_3$ ) 144.9 (4'-C), 135.1 (1'-C), 128.6 (3', 5'-C), 127.3 (2', 6'-C), 50.7 (1-C), 44.6 (2-C), 40.1 (3 or 4 or 5-C), 37.2 (3 or 4 or 5-C), 26.9 (6-C), 24.8 (7 or 8-C), 24.7 (7 or 8-C), 21.3 (7'-C), 20.2 (3 or 4 or 5-C);  $m/z$  (EI) 203 ( $[\text{M}+\text{H}]^+$ , 7), 202 ( $\text{M}^+$ , 42), 145 (35), 133 (27), 132 (100), 131 (33), 120 (15), 119 (29), 117 (11), 105 (17%). All spectroscopic data matched that reported in the literature.<sup>4</sup>

<sup>4</sup> C. a) Enzell, H. Erdtman, *Tetrahedron*, 1958, **4**, 361-368. b) B. R. Aavula, Q. Cui, E. A. Mash, *Tetrahedron: Asymmetry*, 2000, **11**, 4681-4686.

**(2*S*)-1-(4,4-Dimethyl-5-*p*-tolyl-hex-5-enyl)-2'-methoxymethyl-pyrrolidine.**

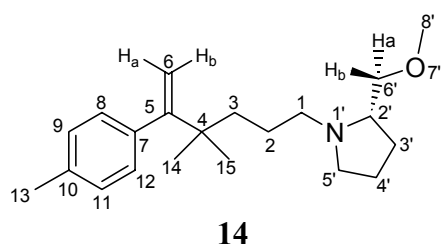

To a solution of alkyl bromide **6**<sup>3</sup> (123 mg, 0.44 mmol) in absolute ethanol (3 mL) was sequentially added (*S*)-(+)-2-methoxymethyl-pyrrolidine<sup>5</sup> (74  $\mu$ L, 0.60 mmol) and anhydrous sodium carbonate (0.47 g, 4.4 mmol). The resulting suspension was heated at 150 °C in a sealed tube for 48 hours. The reaction mixture was diluted with EtOAc, filtered, concentrated in vacuo and finally purified by flash column chromatography on silica gel (triethylamine/hexane 1:95) to afford the alkylated product **14** (107 mg, 77%) as a colourless oil;  $R_f$  0.15 (triethylamine/hexane 1:95);  $\nu_{\max}$  (neat)/ $\text{cm}^{-1}$  3086 (w), 3023 (w), 2964 (s), 2871 (s), 2806 (m), 1625 (w), 1512 (m), 1459 (m), 1112 (s), 904 (m), 824 (s);  $\delta_{\text{H}}$  (360 MHz,  $\text{CDCl}_3$ ) 7.07 (2H, d,  $J$  8.0, 9, 11-H), 7.01 (2H, d,  $J$  8.1, 8, 12-H), 5.10 (1H, d,  $J$  1.7, 6- $\text{H}_b$ ), 4.83 (1H, d,  $J$  1.7, 6- $\text{H}_a$ ), 3.40 (1H, dd,  $J$  4.7 and 9.3, 6'- $\text{H}_a$  or  $\text{H}_b$ ), 3.35 (3H, s, 8'-H), 3.27 (1H, dd,  $J$  4.7 and 9.3, 6'- $\text{H}_a$  or  $\text{H}_b$ ), 3.17-3.13 (1H, m, 5'- $\text{H}_a$  or  $\text{H}_b$ ), 2.78-2.71 (1H, m, 1- $\text{H}_a$  or  $\text{H}_b$ ), 2.56-2.49 (1H, m, 2'-H), 2.34 (3H, s, 13-H), 2.25-2.17 (1H, m, 1- $\text{H}_a$  or  $\text{H}_b$ ), 2.16-2.11 (1H, m, 5'- $\text{H}_a$  or  $\text{H}_b$ ), 1.94-1.60 (4H, m, 3', 4'-H), 1.59-1.43 (2H, m, 2 or 3-H), 1.39-1.26 (2H, m, 2 or 3-H), 1.08 (6H, s, 14-15-H);  $\delta_{\text{C}}$  (90 MHz,  $\text{CDCl}_3$ ) 157.9 (5-C), 140.8 (7-C), 136.1 (10-C), 129.0 (9, 11-C), 128.4 (8, 12-C), 113.8 (6-C), 76.5 (6'-C), 64.1 (2'-C), 59.4 (8'-C), 56.6 (1-C), 54.9 (5'-C), 39.5 (4-C), 38.9 (2 or 3-C), 28.7 (3' or 4'-C), 28.2 (14 or 15-C), 28.0 (15 or 14-C), 24.5 (2 or 3-C), 23.2 (3' or 4'-C), 21.4 (13-C);  $m/z$  (FAB) 316 ( $[\text{M}+\text{H}]^+$ , 96), 315 ( $\text{M}^+$ , 7), 314 (55), 282 (10), 271 (16), 270 (100), 154 (29), 133 (10), 128 (22), 119 (16), 110 (12), 105 (22%); HRMS  $m/z$  (FAB calculated for  $\text{C}_{21}\text{H}_{34}\text{NO}$ , 316.2640 ( $[\text{M}+\text{H}]^+$ ), found 316.2650;  $[\alpha]_{\text{D}}^{20}$   $-64.7$  ( $c$  1.31,  $\text{CHCl}_3$ ).

<sup>5</sup> D. Enders, M. Klatt, *Synthesis*, 1996, 1403-1418.

**(2'S, 1R, 2S)- 2'-Methoxymethyl-1-(2,3,3-trimethyl-2-p-tolyl-cyclopentyl)-pyrrolidine (15) and (2'S, 1S, 2R)- 2'-Methoxymethyl-1-(2,3,3-trimethyl-2-p-**

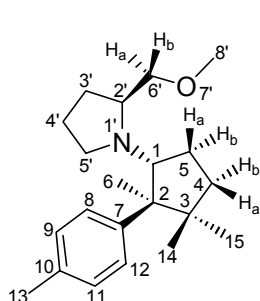

**15**

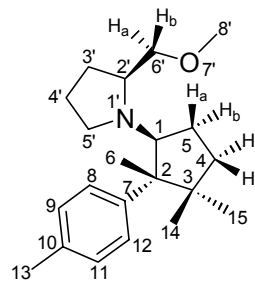

**16**

**tolyl-cyclopentyl)-pyrrolidine (16).**

A hexane solution (280 mL, 0.01M) of styryl amine **14** (1 g, 3.17 mmol) was placed in a quartz vessel and purged with argon for 1 hour. This solution was then irradiated with a medium pressure 400W mercury lamp for 3 hours. NMR analysis of the irradiated sample showed 100% conversion to a mixture of diastereomers in a 10:5:2:1 ratio. After removal of the solvent under reduced pressure, the residue a yellow oil was chromatographed on silica gel (hexane-hexane/diethyl ether 1:1). Two major diastereomers were isolated **16** (84 mg, 8%) and **15** (322 mg, 36%) as colourless oils.

Data for **16**:  $R_f$  0.33 (hexane/diethyl amine 19:1);  $\nu_{\max}$  (neat)/ $\text{cm}^{-1}$  3060 (w), 2958 (s), 2873 (s), 2822 (s), 2360 (w), 2340 (w), 1515 (m), 1463 (m), 1196 (m), 1113 (s), 811 (m);  $\delta_H$  (360 MHz,  $\text{CDCl}_3$ ) 7.31 (2H, d,  $J$  8.2, 8, 12-H), 7.05 (2H, d,  $J$  8.1, 9, 11-H), 3.96 (1H, t,  $J$  8.6, 1-H), 3.36-3.29 (1H, m, 6'- $H_a$  or  $H_b$ ), 3.33 (3H, s, 8'-H), 3.06-3.00 (2H, m, 6'- $H_a$  or  $H_b$  and 2'-H), 2.35-2.26 (1H, m, 5'- $H_a$  or  $H_b$ ), 2.31 (3H, s, 13-H), 2.19-2.14 (1H, m, 5'- $H_a$  or  $H_b$ ), 2.11-2.03 (1H, m, 5- $H_b$ ), 1.93-1.89 (1H, m, 5- $H_a$ ), 1.78-1.74 (1H, m, 4- $H_a$  or  $H_b$ ), 1.70-1.65 (2H, m, 3'-H), 1.55-1.40 (3H, m, 4- $H_a$  or  $H_b$  and 4'-H), 1.30 (3H, s, 6-H), 0.80 (3H, s, 14-H), 0.67 (3H, s, 15-H);  $\delta_C$  (90 MHz,  $\text{CDCl}_3$ ) 142.0 (10-C), 135.0 (7-C), 128.2 (8, 12-C), 127.9 (9, 11-C), 78.2 (6'-C), 68.4 (1-C), 61.9 (2'-C), 59.3 (8'-C), 54.8 (5'-C), 54.0 (2-C), 45.0 (3-C), 38.0 (4-C), 29.0 (3'-C), 28.7 (15-C), 24.5 (4'-C), 24.3 (14-C), 21.3 (13-C), 16.9 (6-C);  $m/z$  (EI) 315

( $M^+$ , 8), 270 (37), 155 (17), 154 (100), 110 (10%); HRMS  $m/z$  (EI) calculated for  $C_{21}H_{33}NO$ , 315.25623 ( $M^+$ ), found 315.25714;  $[\alpha]_D^{20} +37.4$  ( $c$  1.2,  $CHCl_3$ ).

Data for **15**:  $R_f$  0.30 (hexane/diethyl amine 19:1);  $\nu_{max}$  (neat)/ $cm^{-1}$  2956 (s), 2872 (s), 2824 (m), 2360 (m), 2341 (m), 1515 (m), 1467 (m), 1376 (w), 1196 (w), 1112 (s), 1017 (w), 812 (m);  $\delta_H$  (360 MHz,  $CDCl_3$ ) 7.34 (2H, d,  $J$  8.2, 8, 12-H), 7.08 (2H, d,  $J$  8.1, 9, 11-H), 4.14 (1H, t,  $J$  8.7, 1-H), 3.32 (1H, dd,  $J$  8.5 and 4.0, 6'- $H_a$  or  $H_b$ ), 3.23 (3H, s, 8'-H), 3.15-3.09 (2H, m, 6'- $H_a$  or  $H_b$  and 2'-H), 2.60-2.50 (2H, m, 5'-H), 2.31 (3H, s, 13-H), 2.12-2.06 (1H, m, 5- $H_a$ ), 1.86-1.77 (1H, m, 5- $H_b$ ), 1.75-1.71 (2H, m, 4- $H_b$  and 3' or 4'-H), 1.63-1.49 (4H, m, 4- $H_a$  and 3', 4'-H), 1.30 (3H, s, 6-H), 0.82 (3H, s, 15-H), 0.64 (3H, s, 14-H);  $\delta_C$  (90 MHz,  $CDCl_3$ ) 141.9 (7-C), 135.1 (10-C), 128.2 (8, 12-C), 128.0 (9, 11-C), 74.8 (6'-C), 65.1 (1-C), 61.8 (2'-C), 59.2 (8'-C), 53.4 (2 or 3-C), 51.1 (5'-C), 44.8 (3 or 2-C), 37.3 (3' or 4'-C), 28.5 (14-C), 27.9 (4-C), 24.5 (5-C), 24.4 (15-C), 24.0 (3' or 4'-C), 21.3 (13-C), 17.4 (6-C);  $m/z$  (EI) 315 ( $M^+$ , 8), 270 (37), 155 (17), 154 (100), 110 (10%); HRMS  $m/z$  (EI) calculated for  $C_{21}H_{33}NO$ , 315.25623 ( $M^+$ ), found 315.25728;  $[\alpha]_D^{20} -83.9$  ( $c$  1.22,  $CHCl_3$ ).

**(S)-(-)- Cuparene.**

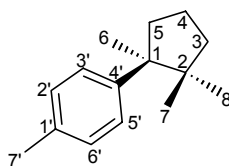

**(S)-(-)- Cuparene**

To (2'S, 1R, 2S)-2'-Methoxymethyl-1-(2,3,3-trimethyl-2-*p*-tolyl-cyclopentyl)-pyrrolidine **15** (30 mg, 0.095 mmol) dissolved in dichloromethane (1 mL) at 0°C was added dropwise a solution of *m*-chloroperbenzoic acid (20 mg, 0.11 mmol) in dichloromethane (1 mL). Once the addition was complete the reaction was brought to room temperature and stirred for 3 hours. The reaction was then quenched with Na<sub>2</sub>S<sub>2</sub>O<sub>3</sub> and washed with saturated aqueous NaHCO<sub>3</sub>. The combined organic extracts were dried over magnesium sulphate and the solvent removed in vacuo to give the crude amine oxide as a pale brown sticky oil (30 mg). The crude amine oxide (30 mg) was then transferred to a microwave tube using deuterated DMSO (0.8 mL). The pale yellow solution was then irradiated (100W) in the chamber for 1 minute which raised the temperature to 200°C. The resulting dark brown solution was then cooled, diluted with diethyl ether and washed with water. The organic layer was removed and the aqueous was extracted with diethyl ether. The combined organic extracts were washed with brine, dried over magnesium sulphate, filtered and rotary evaporated to give the crude alkene as a orange/brown oil (29.8 mg) which was used in the next step without further purification. To a solution of the crude alkene (29.8 mg) in EtOAc (10 mL) was added 5% Pd on charcoal (12 mg). The mixture was stirred under atmospheric hydrogen for 3 hours. The catalyst was removed by filtration through celite. The combined filtrate and washings were concentrated in vacuo to afford a pale yellow oil, which was purified by flash column chromatography (hexane) to give the title compound as a colourless oil (4.6 mg, 24% over 3 steps); R<sub>f</sub> 0.66 (hexane); ν<sub>max</sub> (neat)/cm<sup>-1</sup> 3094 (m), 3061 (m), 3025 (m), 2969 (s), 2874 (s), 2727 (m), 1898 (m), 1790 (m), 1516 (s), 1459 (s), 1374 (s), 1193 (m), 1135 (w), 1108 (w), 1020 (m); δ<sub>H</sub> (360 MHz, CDCl<sub>3</sub>) 7.23 (2H, d, J 8.2, 3', 5'-H), 7.08 (2H, d, J 8.1, 2', 6'-H), 2.53-2.45 (1H, m, 5-H<sub>a</sub> or H<sub>b</sub>), 2.31 (3H, s, 7'-H), 1.83-

1.64 (4H, m, 3, 4-H), 1.61-1.43 (1H, m, 5-H<sub>a</sub> or H<sub>b</sub>), 1.25 (3H, s, 6-H), 1.06 (3H, s, 8-H), 0.56 (3H, s, 7-H);  $\delta_C$  (90 MHz, CDCl<sub>3</sub>) 144.9 (4'-C), 135.1 (1'-C), 128.6 (3', 5'-C), 127.3 (2', 6'-C), 50.7 (1-C), 44.6 (2-C), 40.1 (3 or 4 or 5-C), 37.2 (3 or 4 or 5-C), 26.9 (6-C), 24.8 (7 or 8-C), 24.7 (7 or 8-C), 21.3 (7'-C), 20.2 (3 or 4 or 5-C); m/z (EI) 203 ([M+H]<sup>+</sup>, 7), 202 (M<sup>+</sup>, 42), 145 (35), 133 (27), 132 (100), 131 (33), 120 (15), 119 (29), 117 (11), 105 (17%);  $[\alpha]_D^{20}$  -62.2 (*c* 0.23, CDCl<sub>3</sub>), lit.<sup>6</sup>  $[\alpha]_D^{20}$  -63 (*c* 1.6, CHCl<sub>3</sub>). All spectroscopic data matched that reported in the literature.<sup>4b</sup>

---

<sup>6</sup> A. Matsuo, N. Nakayama, M. Nakayama, *Phytochemistry*, 1985, **24**, 777-781.



agp3/386 (p2)  
proton.k CDC13 (C:\bruker\lxwin-nmr) agp 3

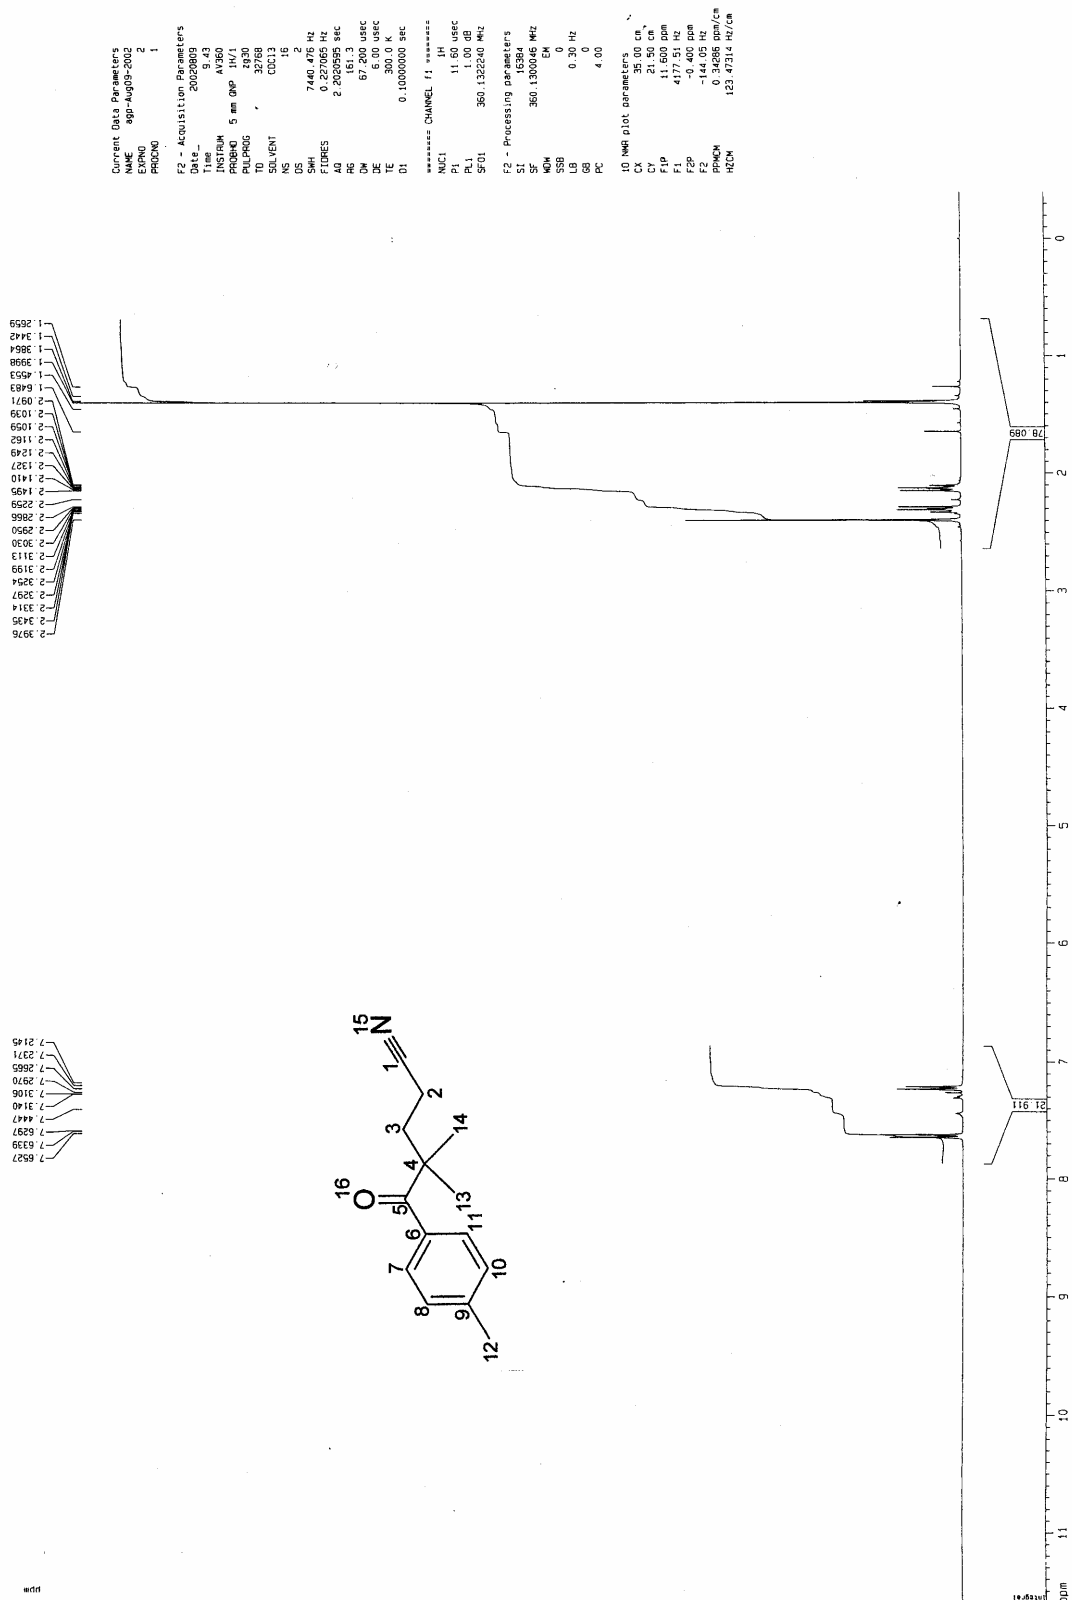

agpJ/38b (p2)  
 c13cpdno.k CDC13 {C:\bruker\xwin-nmr} agp 50

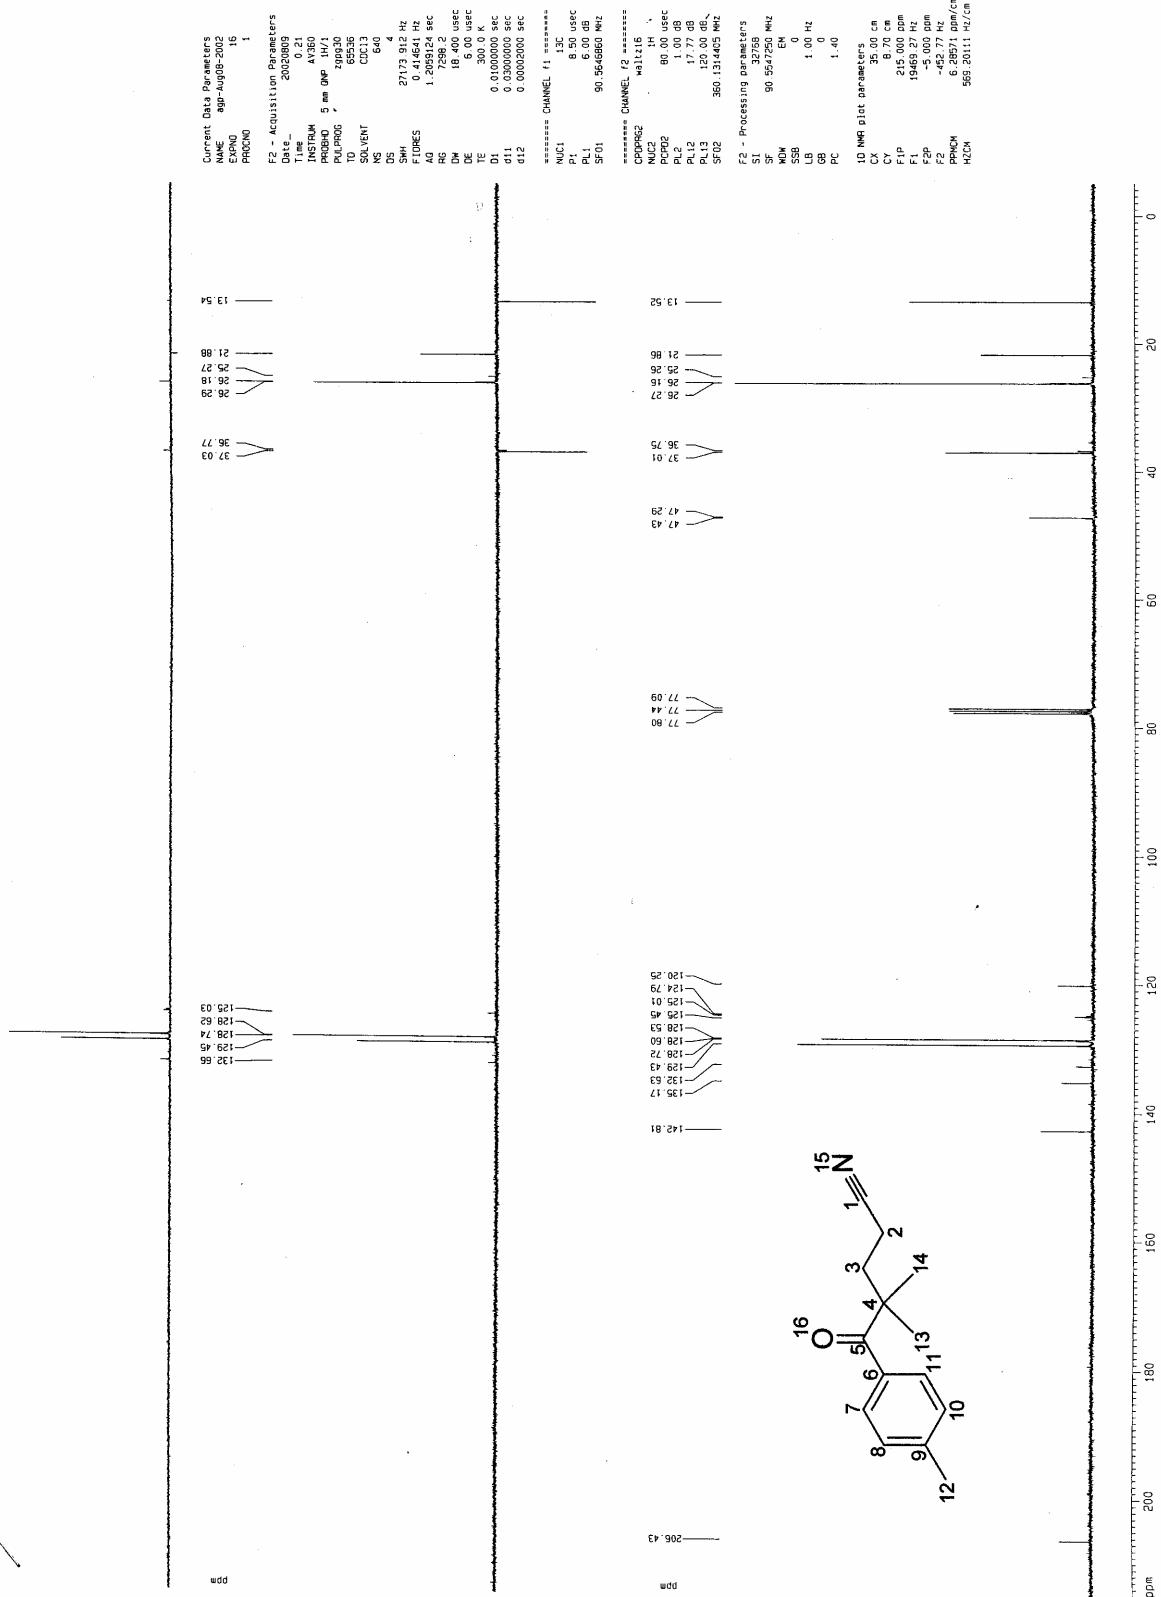

agg3/388 (p3)  
 proton.k CDC13 {C:\bruker\win-nmr} agg 59

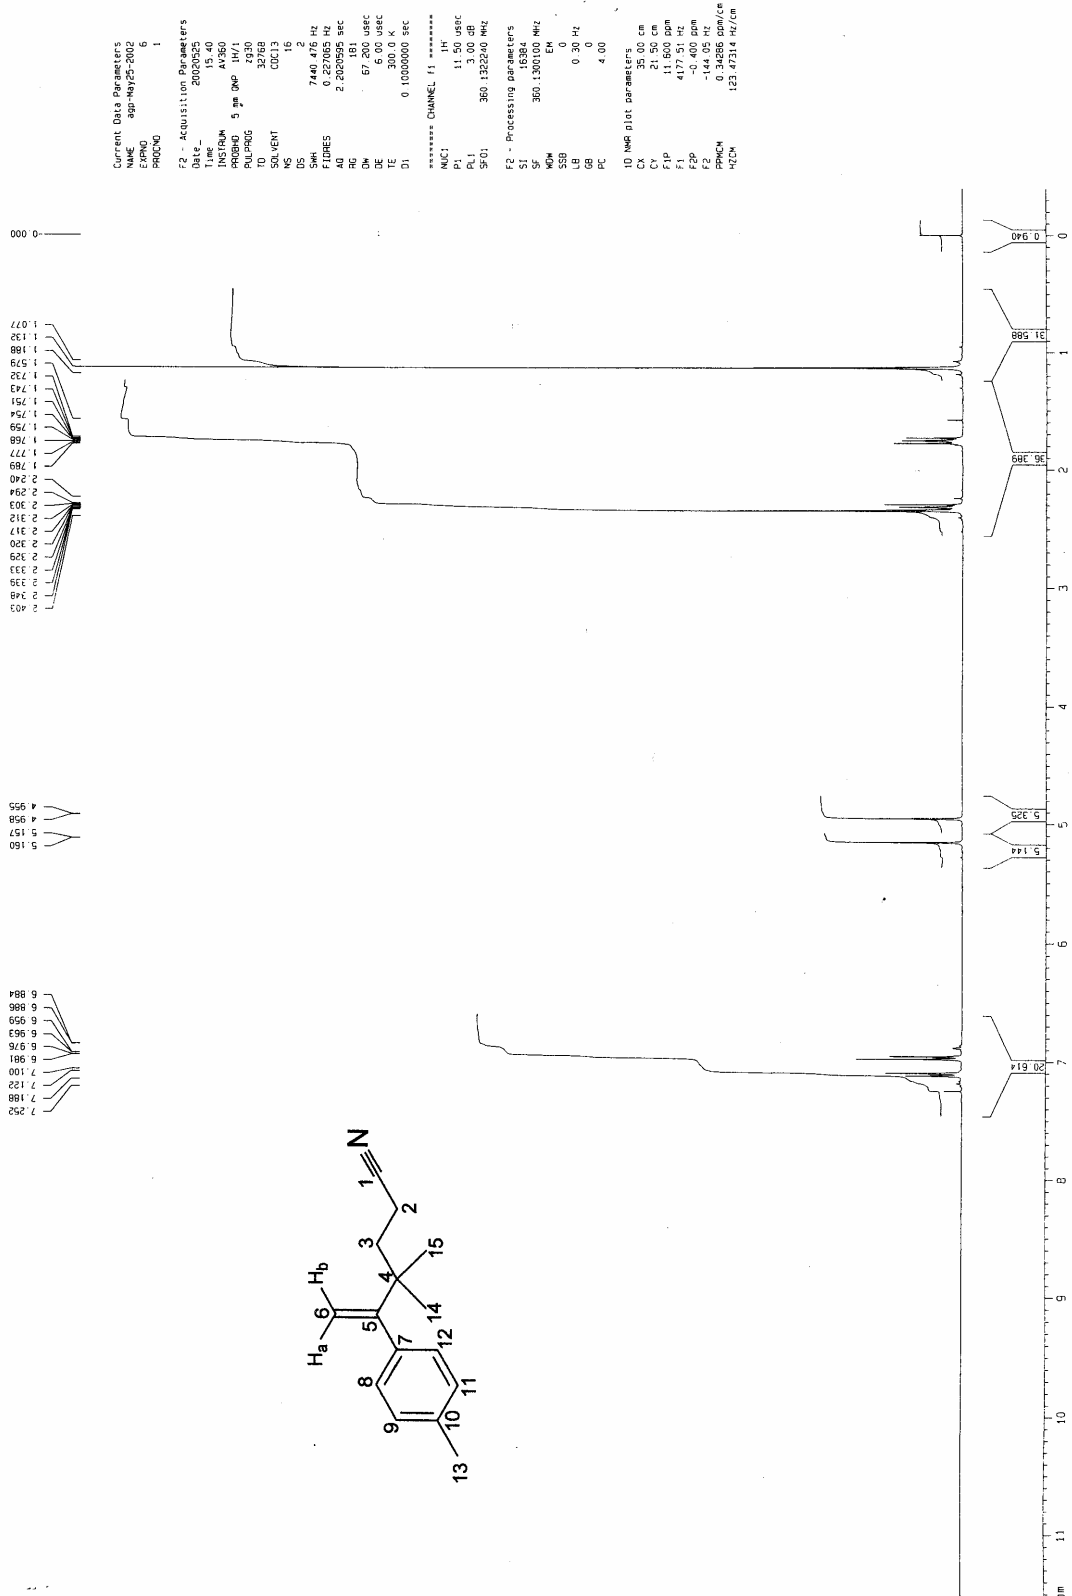

agp3/388 (p3)  
 c13cpdno.k CDC13 {C:\bruker\XWIN-NMR} agp 59

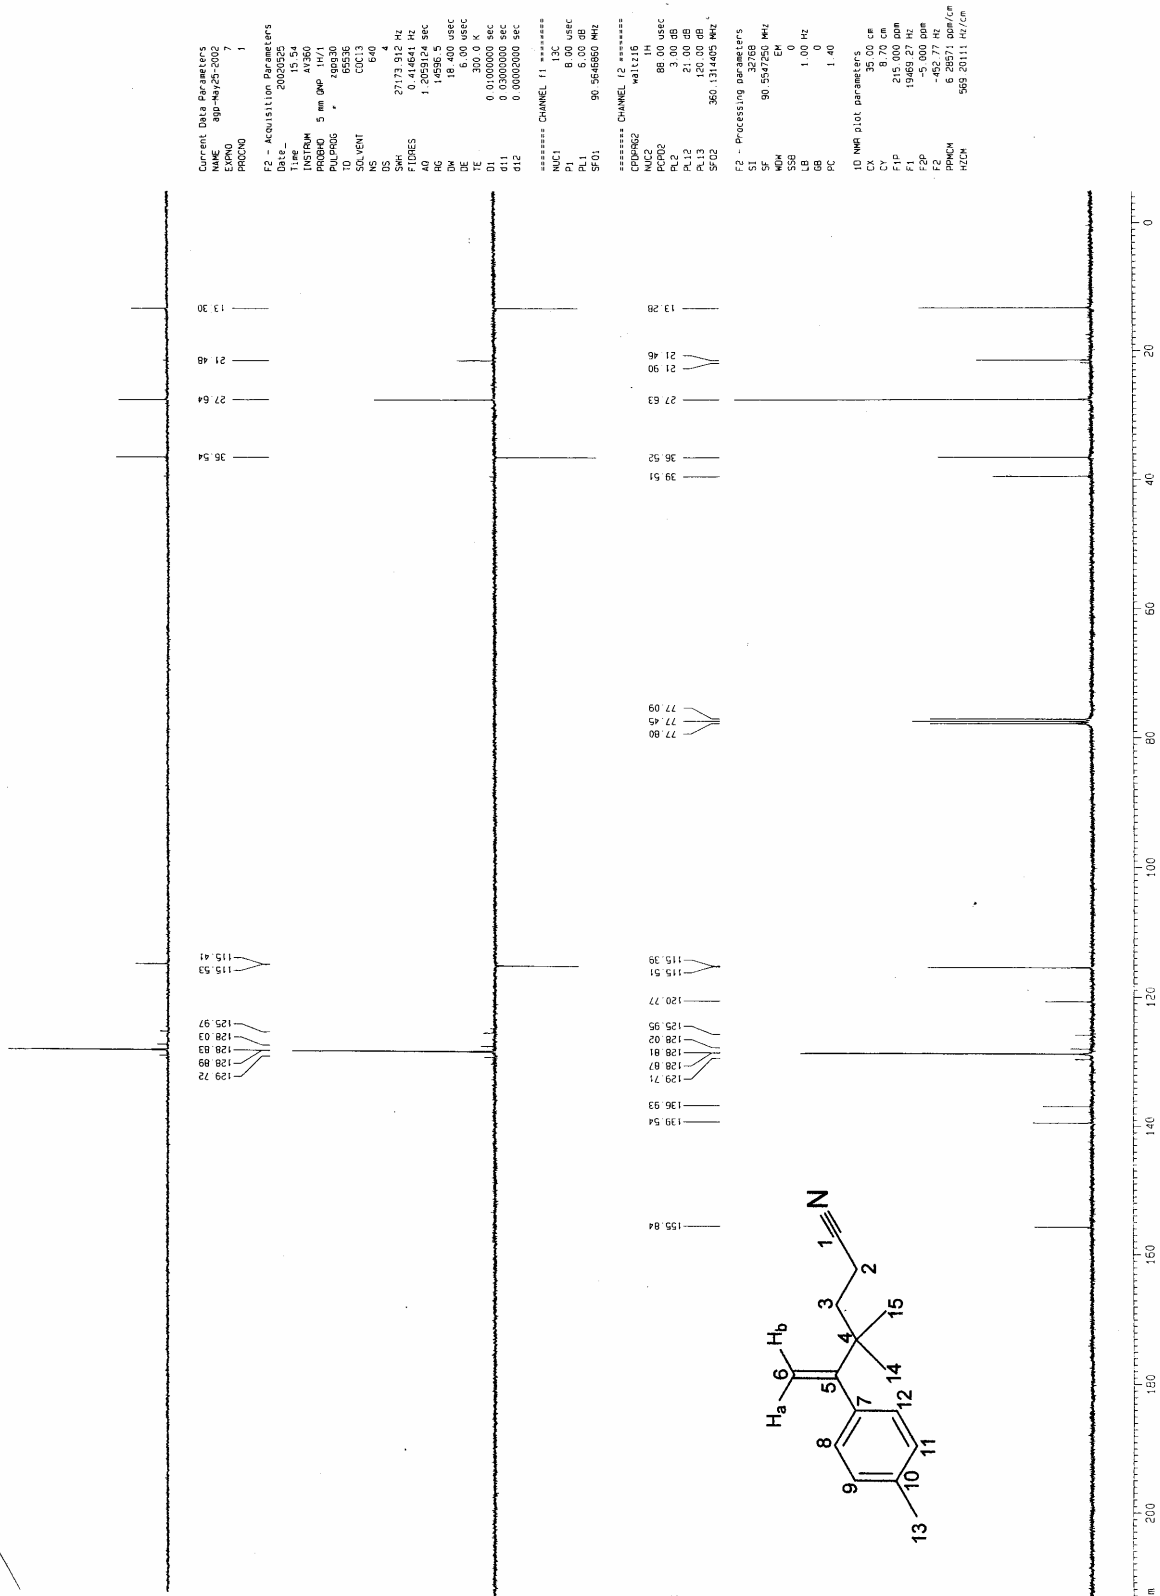

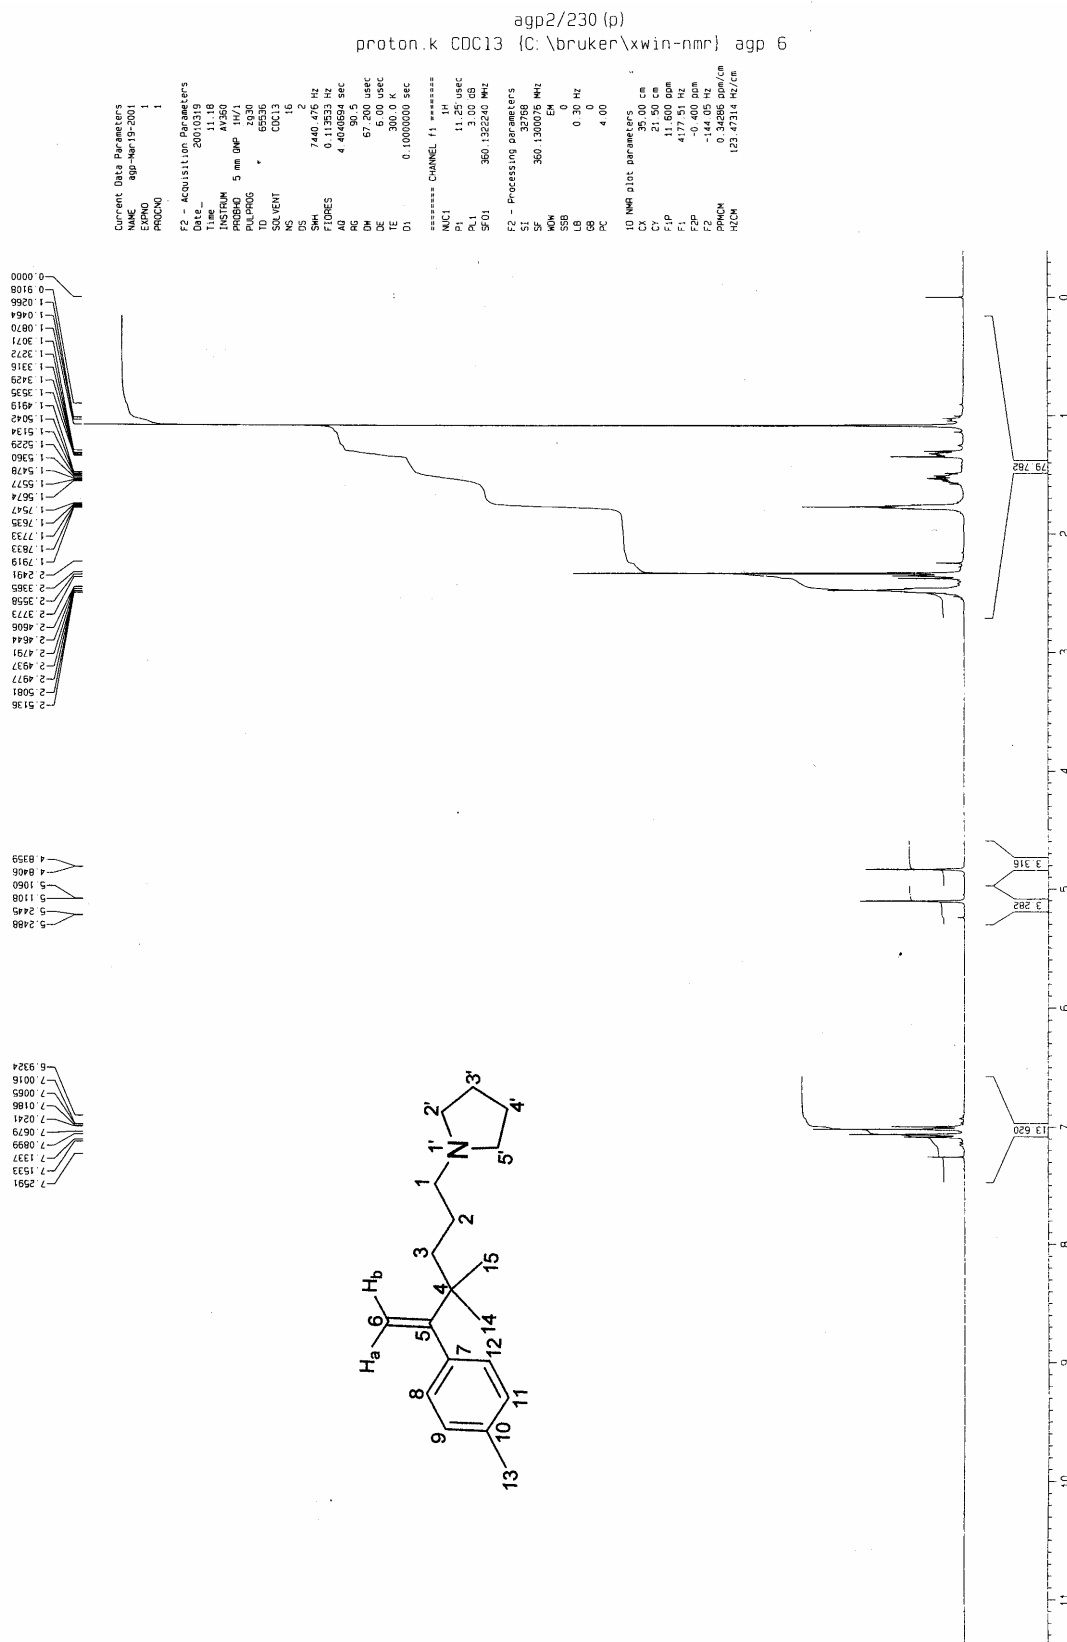

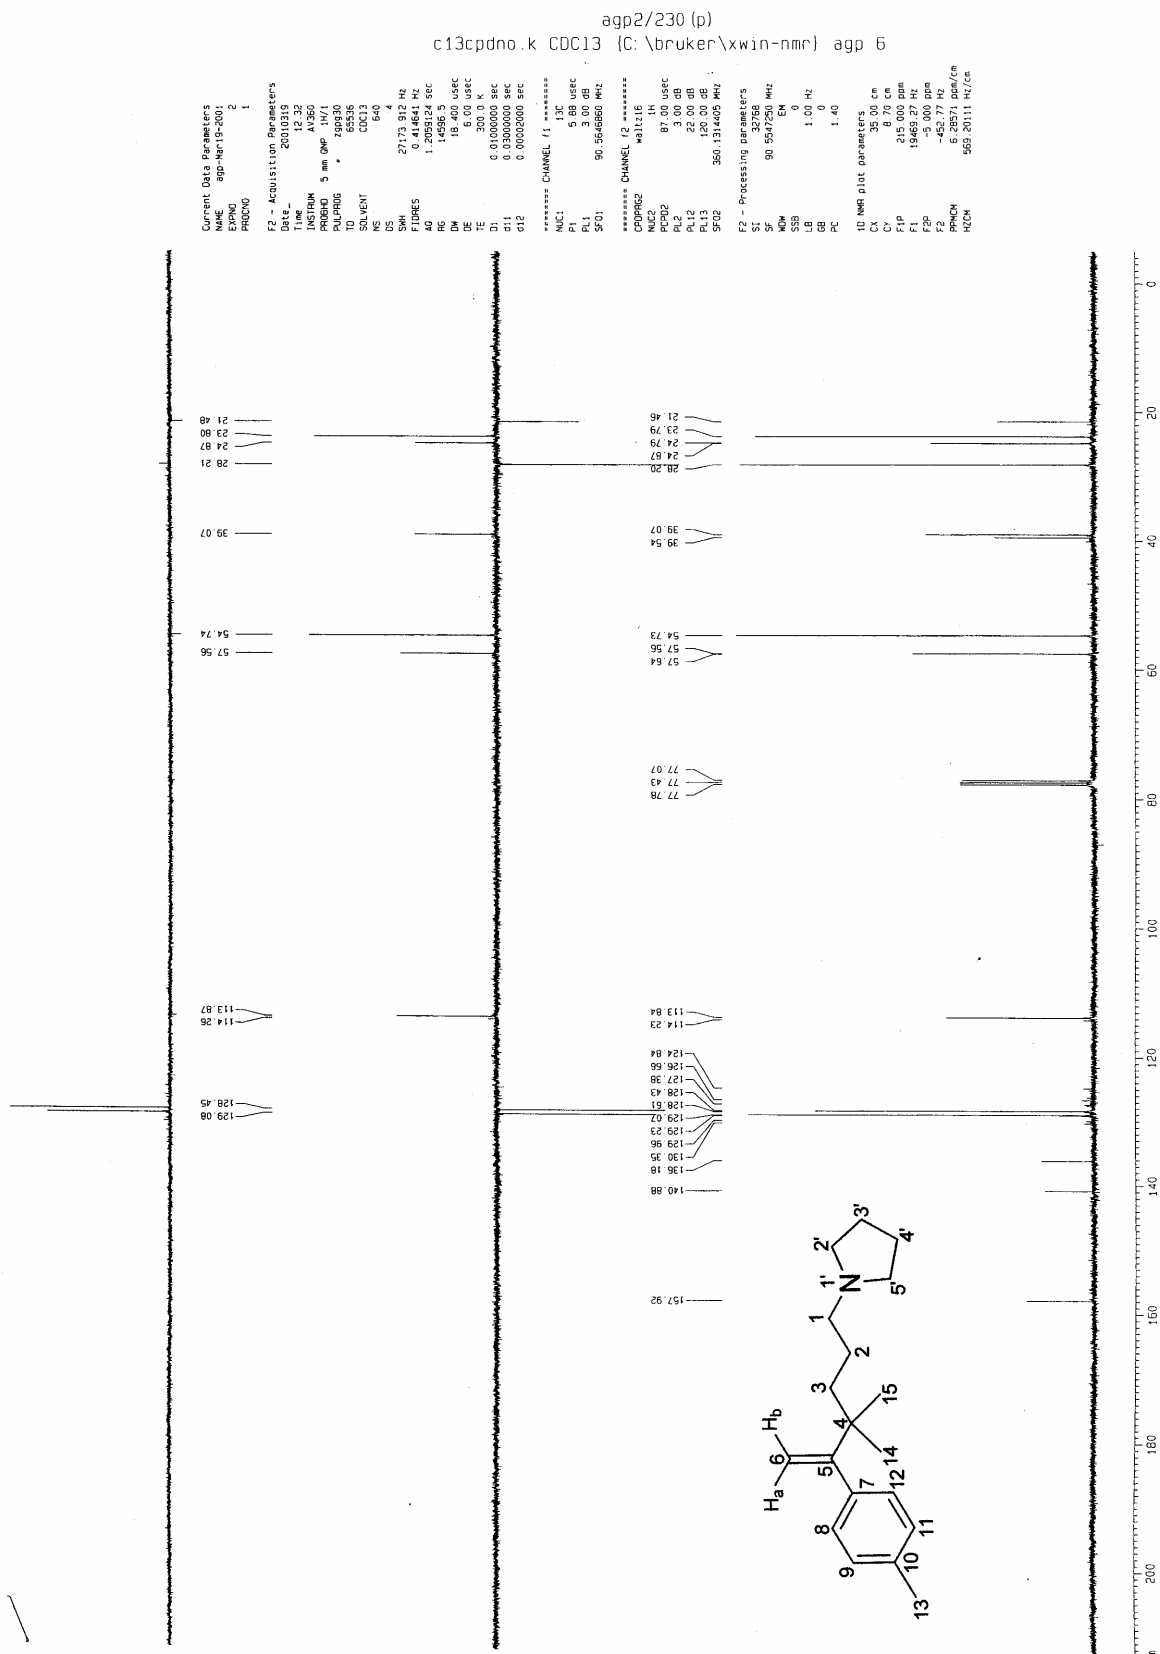

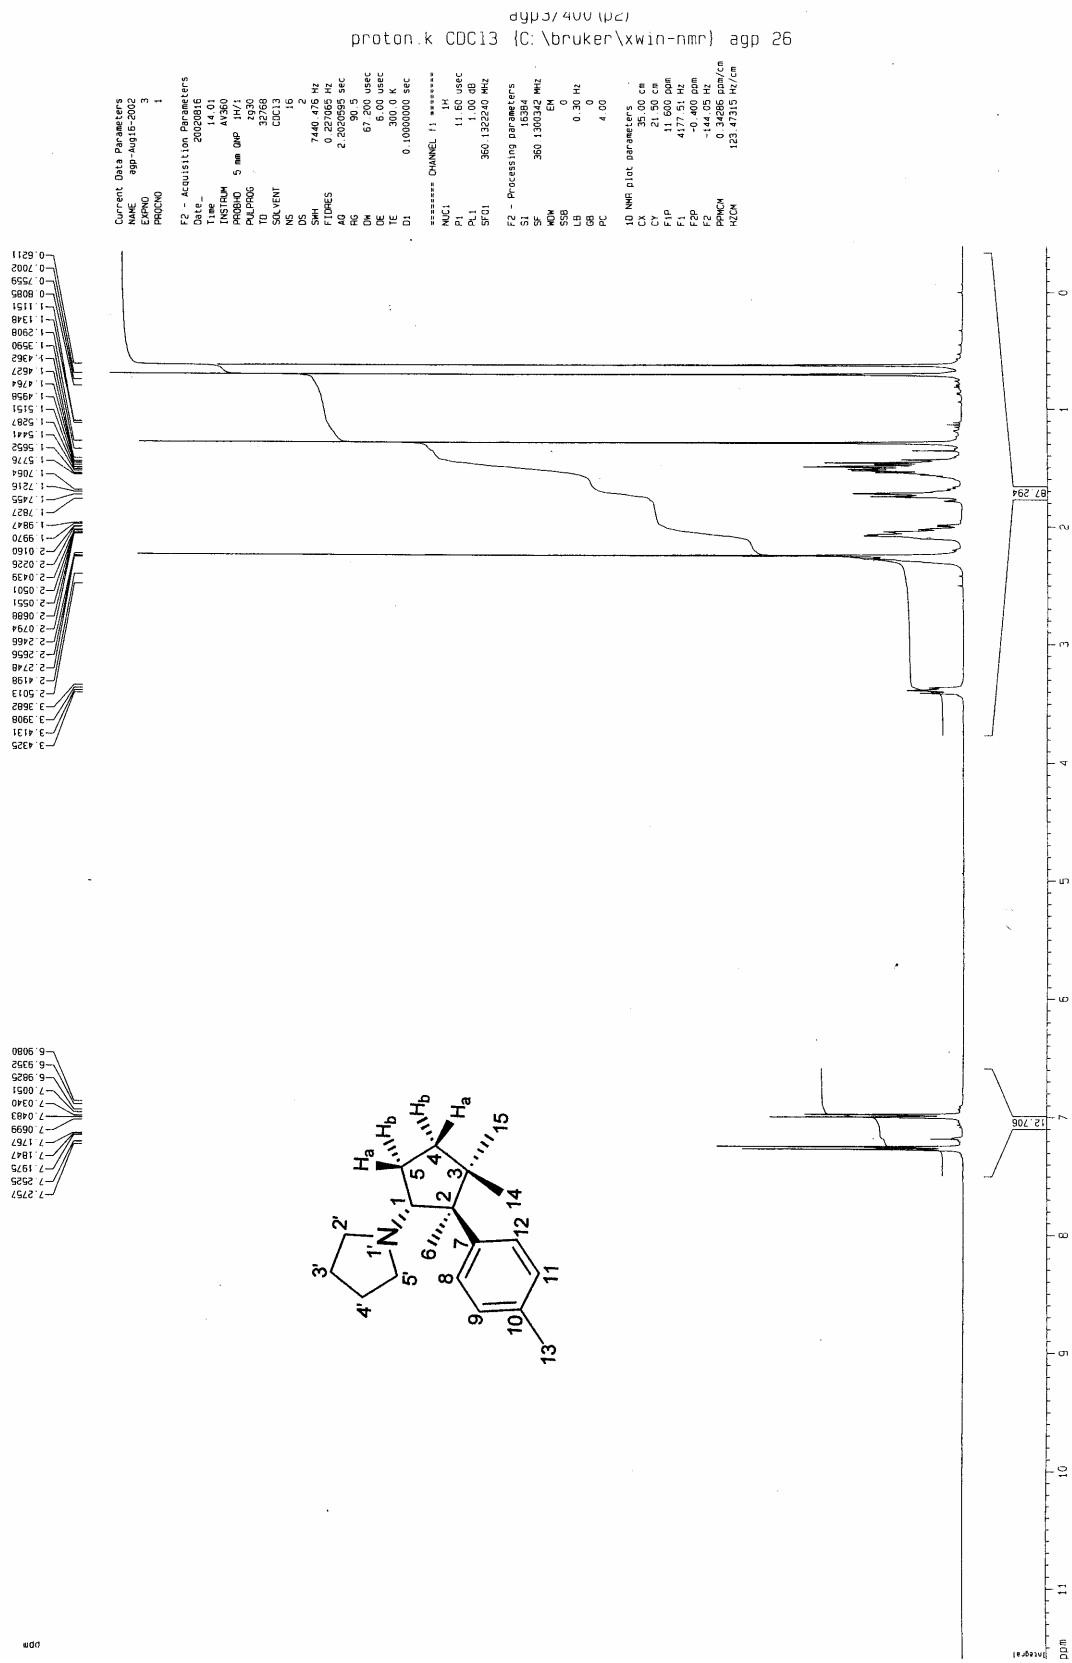

agp3/400 (p2)  
 c13cpdno.k CDC13 (C:\bruker\swinn-nmr) Administrator 54

```

Current Data Parameters
EXPNO 4
PROCNO 1
F2 - Acquisition Parameters
Date_ 20050515
Time 10.35
INSTRUM AVX360
PROBHD 5 mm QNP 1H/1
PULPROG zgpg30
TD 65536
SOLVENT CDCl3
NS 4
DS 4
SWH 27173.612 Hz
FIDRES 0.414641 Hz
AQ 1.265924 sec
RG 327.5
DM 18.400 USEC
DE 6.00 USEC
TE 300.0 K
D1 0.01000000 sec
d11 0.03000000 sec
d12 0.03000000 sec
d13 0.03000000 sec
d14 0.03000000 sec
===== CHANNEL f1 =====
NUC1 13C
P1 8.50 USEC
PL 0.00 dB
SFO1 90.563636 MHz
===== CHANNEL f2 =====
CPDPRG2 waltz16
NUC2 1H
P2 8.00 USEC
PL2 0.00 dB
SFO2 360.131400 MHz
F2 - Processing parameters
SI 32768
SF 90.564572 MHz
WDW EM
SSB 0
GB 0
PC 1.40
=====
ID MRB plot parameters
CX 35.00 cm
CY 1.00 cm
CZ 1.00 cm
F1 215.000 ppm
F2 19469.26 Hz
F3 -5.000 ppm
F4 -62.77 Hz
PRMCH 6 28571 ppm/cm
NUCCH 99.20074 Hz/cm
    
```

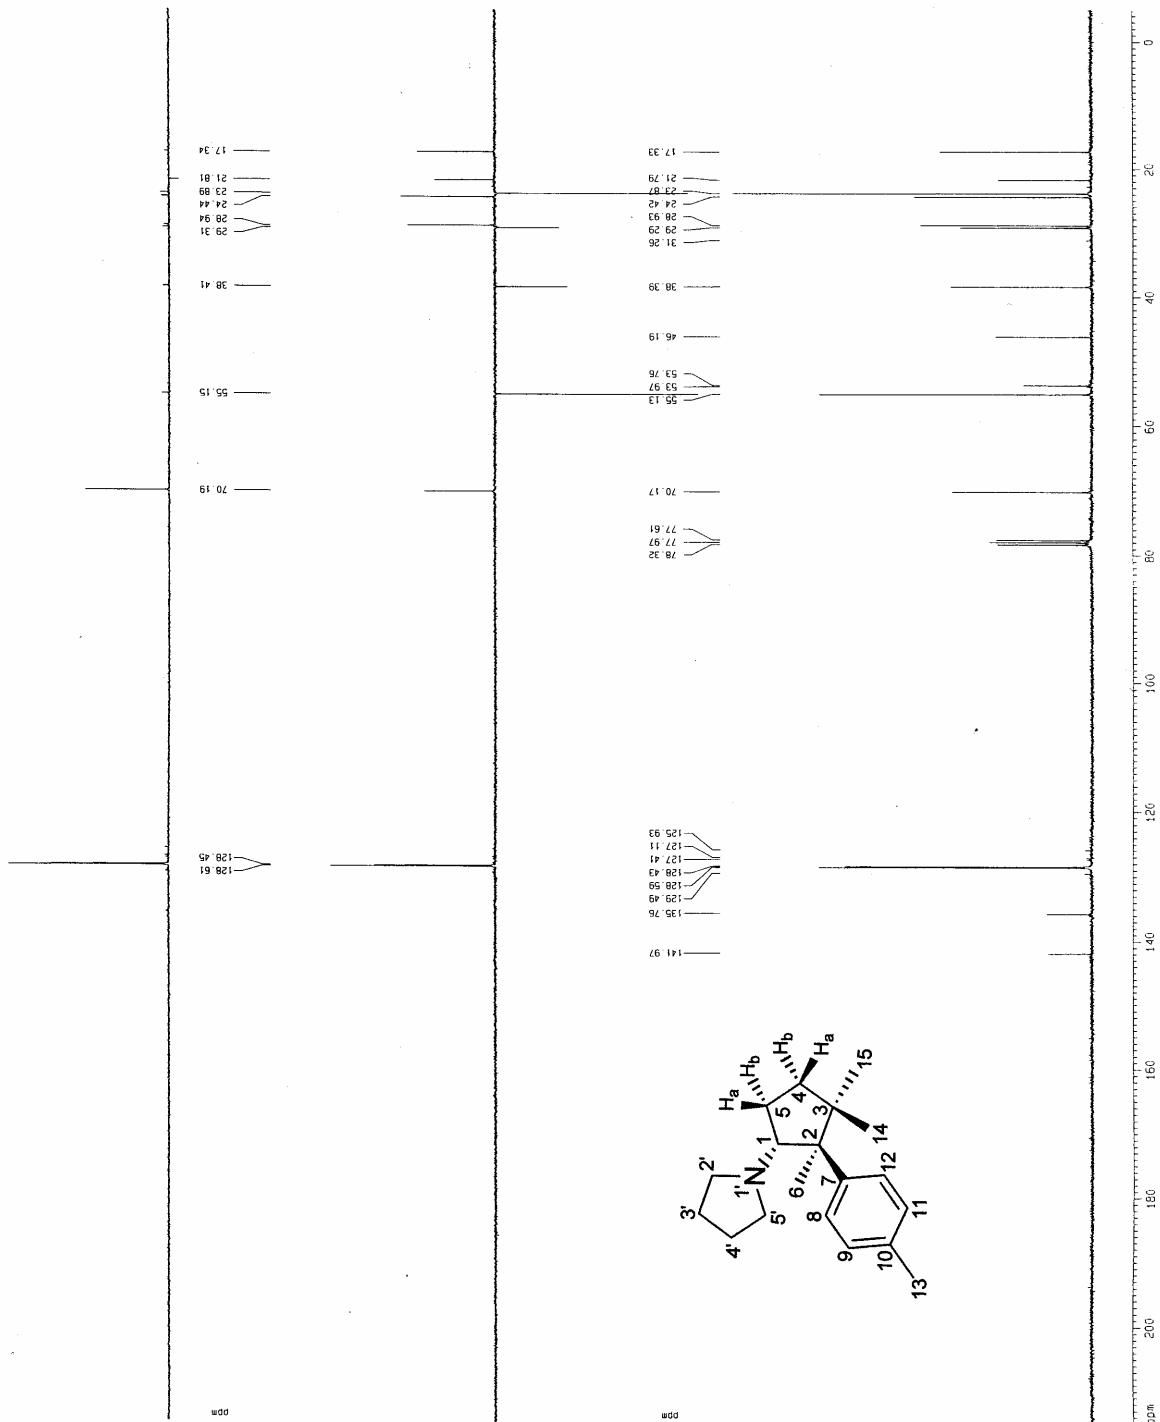



ABPZ/  
 nobesydsm\_a3\_00013 C:/u jeh 2

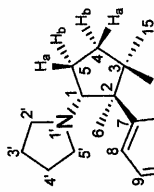

Current Data Parameters  
 NAME JJJ2501-5\_002 11  
 PROCNO 1

F2 - Acquisition Parameters  
 Date\_ 20010725  
 Time 20:02  
 INSTRUM drx500  
 PROBHD 5 mm BBO BB-  
 PULPROG zgpg30  
 TO 2048  
 SOLVENT CDCl3  
 NS 16  
 DS 4  
 SWH 406.57 Hz  
 FIDRES 1.975264 Hz  
 AQ 0.2531628 sec  
 RG 32  
 DM 123.600 uS  
 DE 6.00 uS  
 IE 0.0003000 sec  
 OI 1.44738100 sec  
 OB 0.80000001 sec  
 INO 0.00012860 sec

\*\*\*\*\* CHANNEL f1 \*\*\*\*\*  
 NUC1 H  
 P1 11.75 uS  
 PL1 0.00 dB  
 SFO1 500.1319428 MHz

F1 - Acquisition Parameters  
 NO 2  
 TO 256  
 SFO1 500.1319 MHz  
 FIDRES 15.601982 Hz  
 SW 8.088 ppm

F2 - Processing parameters  
 SI 1024  
 SF 500.1300137 MHz  
 WDW OSINE  
 SS 0  
 LB 0.00 Hz  
 GB 0  
 PC 1.00

F1 - Processing parameters  
 SI 1024  
 SF 500.1300137 MHz  
 WDW OSINE  
 SS 2  
 LB 0.00 Hz  
 GB 0

2D MMR plot parameters  
 CX2 25.00 cm  
 CXL 25.00 cm  
 F2L0 3851.76 Hz  
 F2H1 -0.187 ppm  
 F2H2 -93.55 Hz  
 F1L0 7.801 ppm  
 F1L1 3851.76 Hz  
 F1H1 -93.55 Hz  
 F2PKM 0.32354 ppm/cm  
 F2ZM 161.81230 Hz/cm  
 F1PKM 0.32354 ppm/cm  
 F1ZM 161.81230 Hz/cm

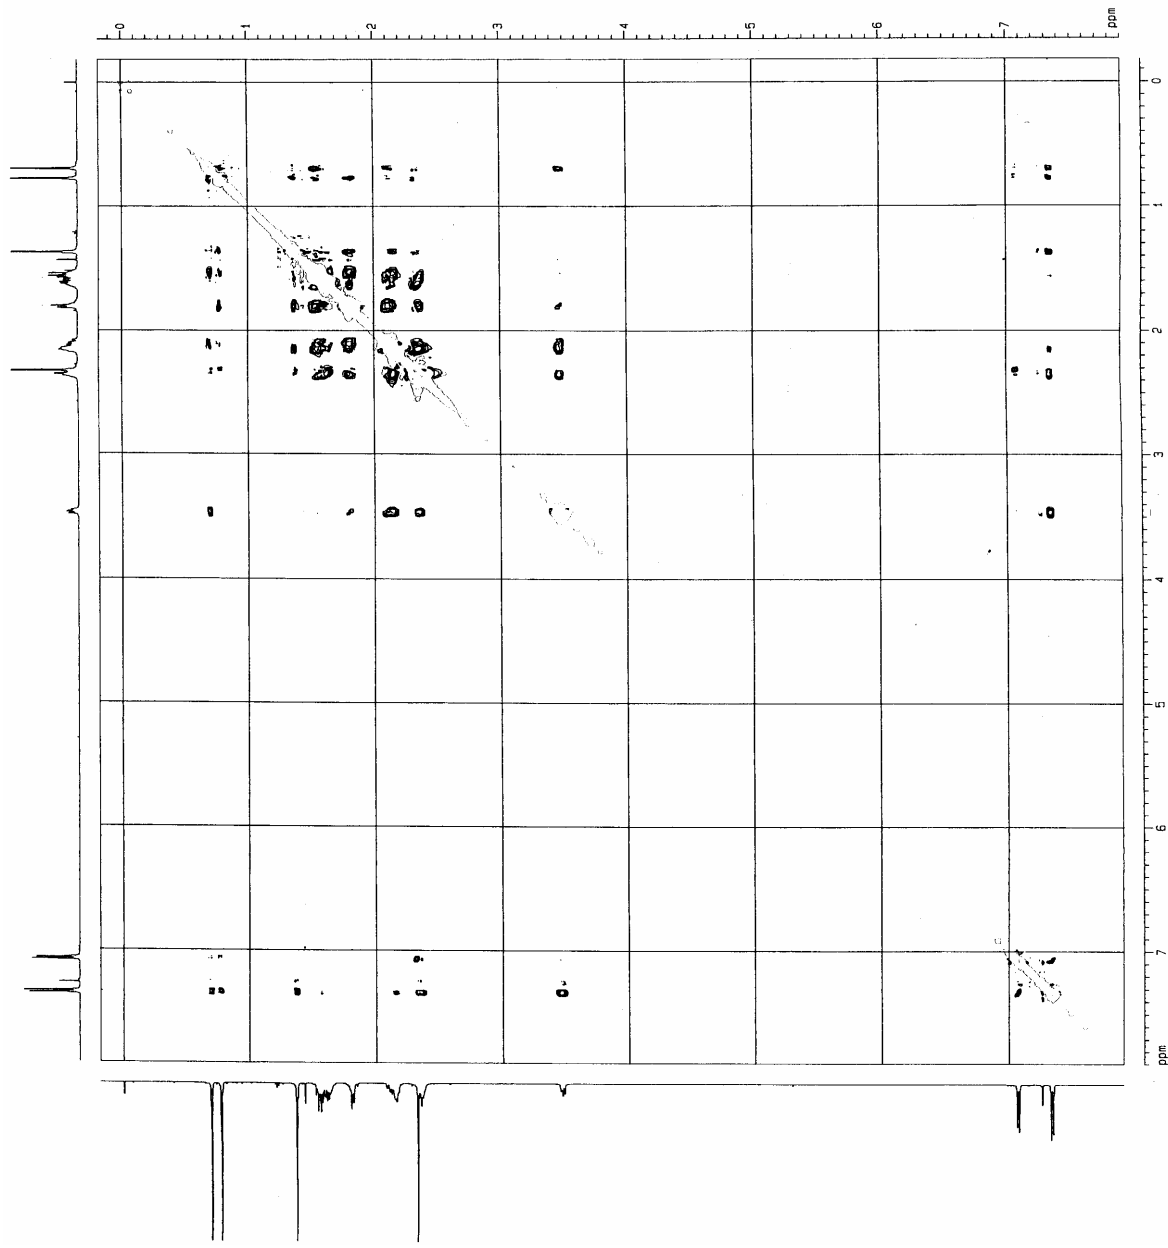

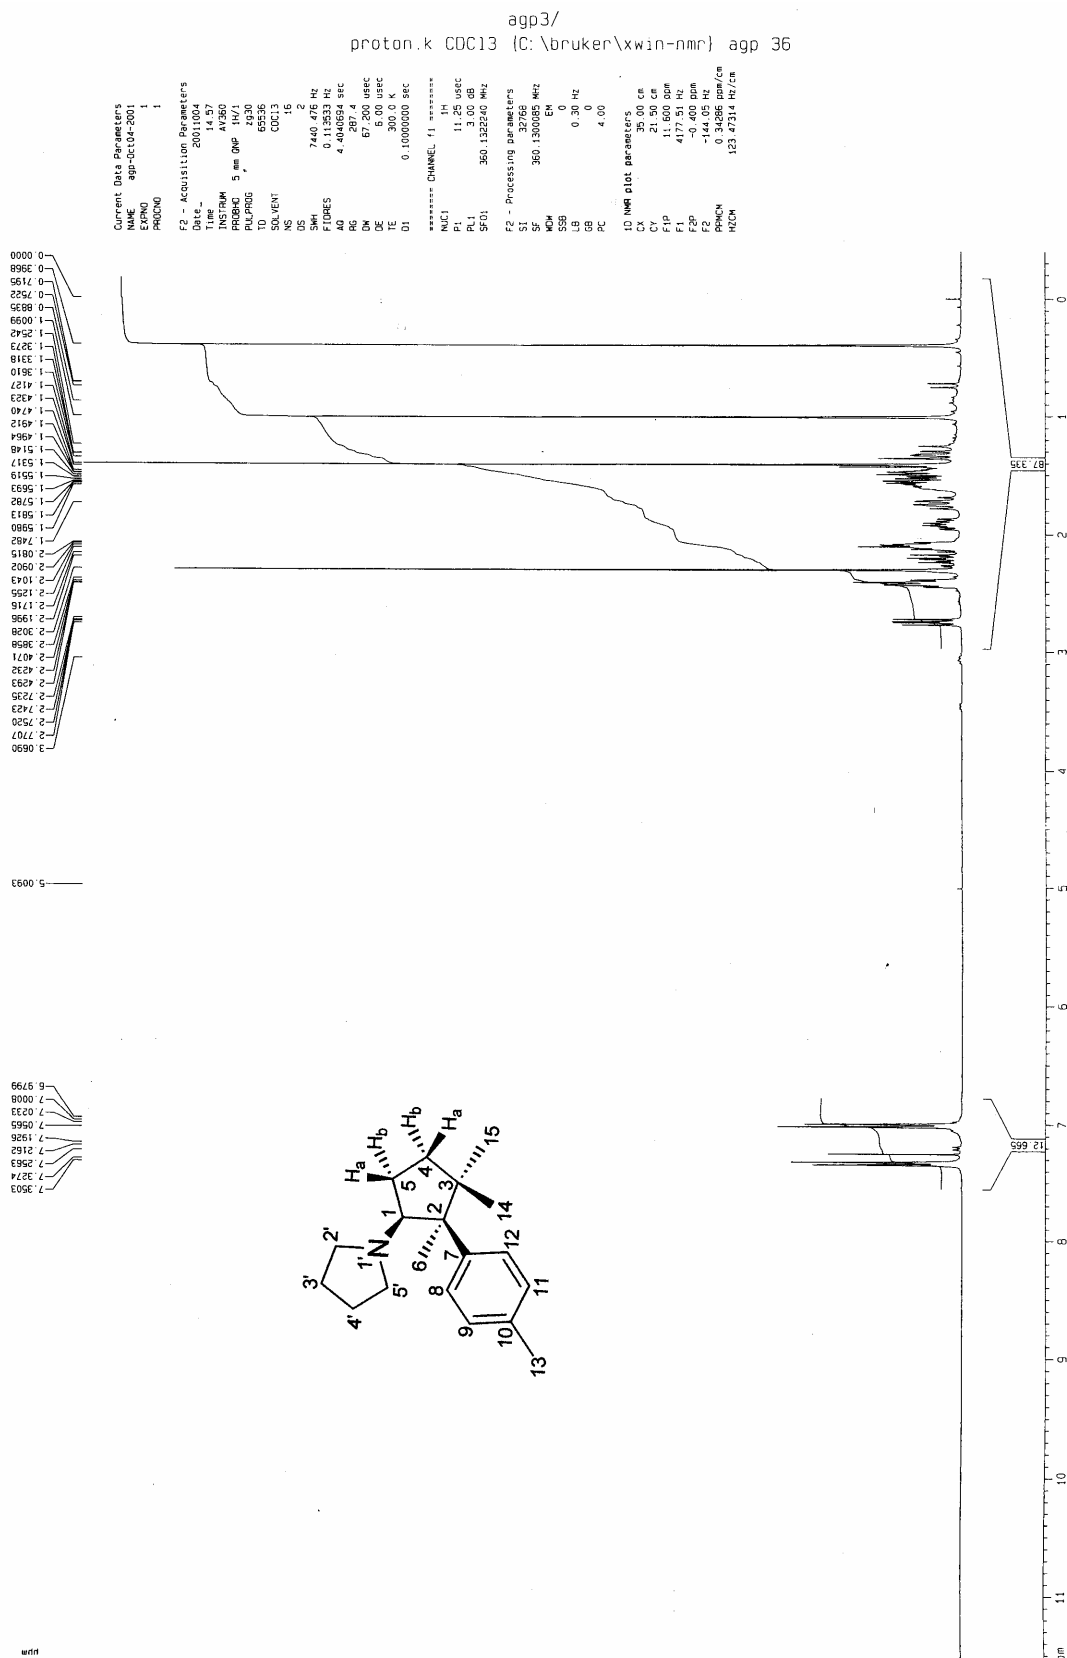

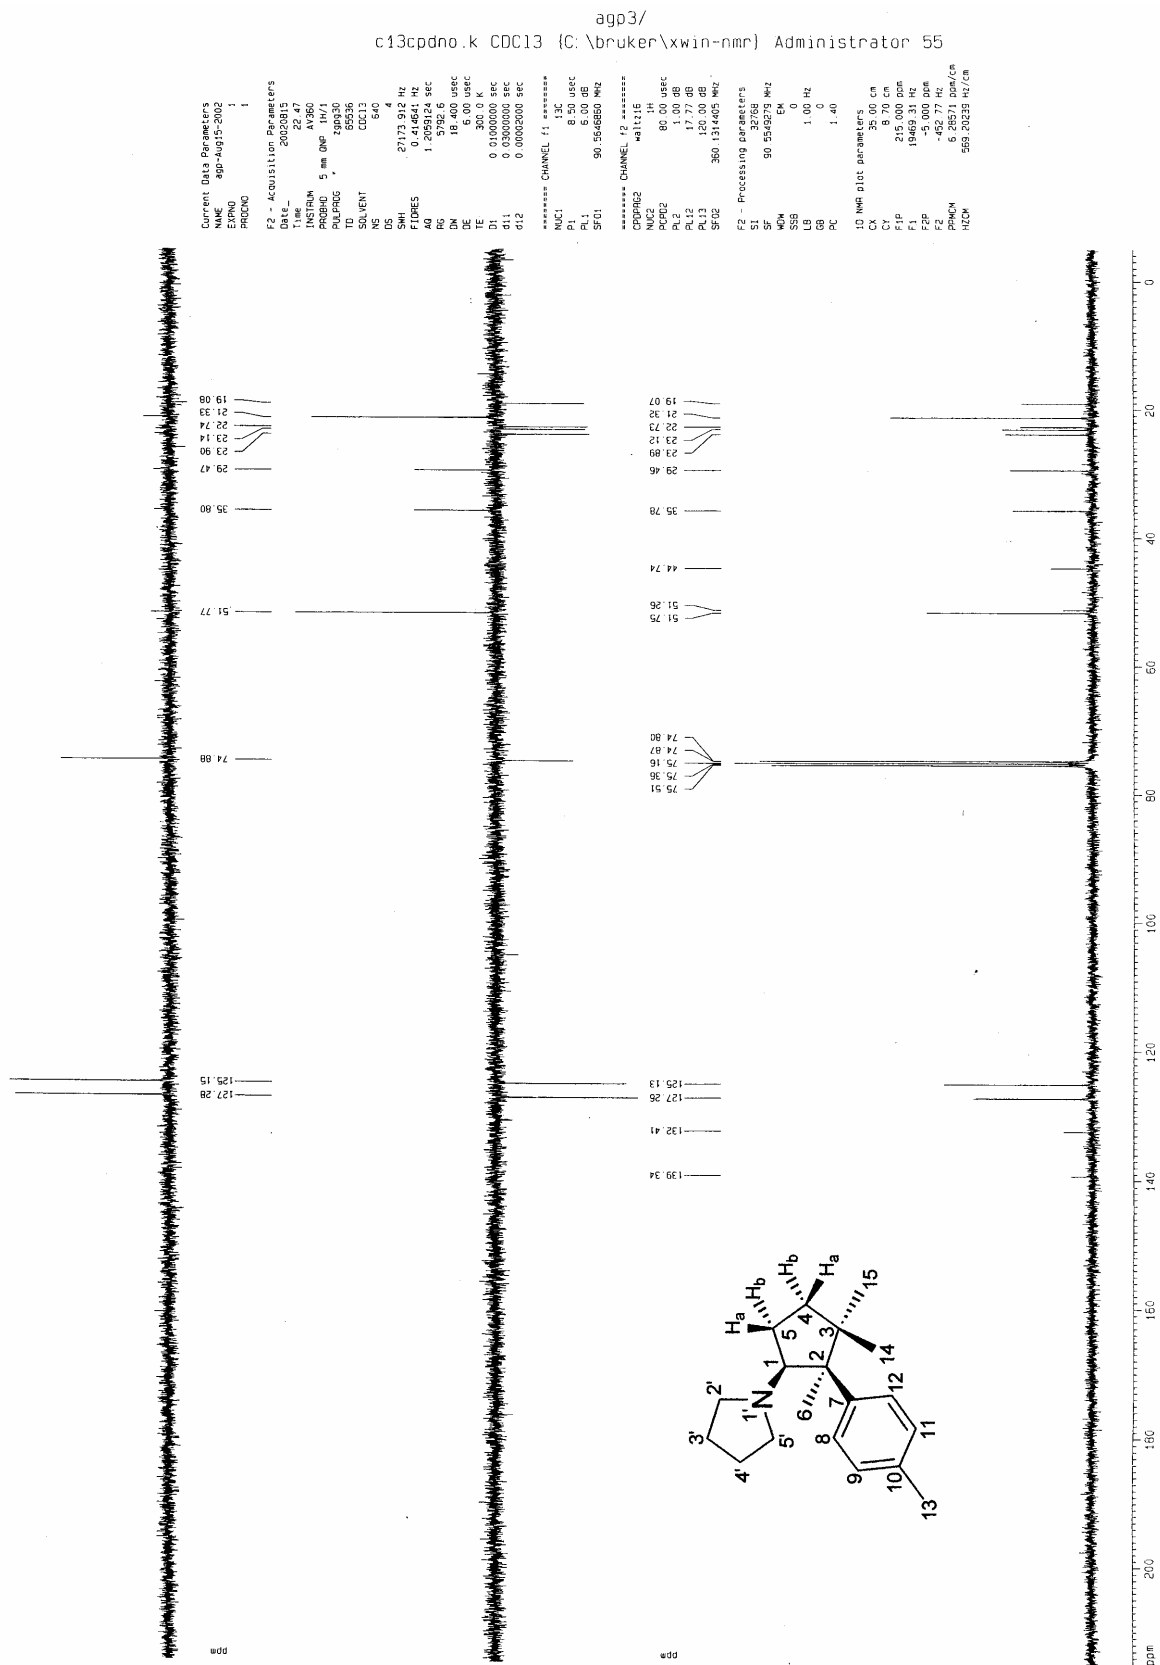

noesy1dsw\_b3.cdci13 C:/u/jeh :  
 ASH2/

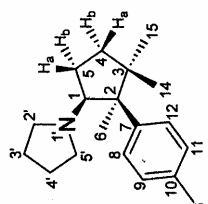

Current Data Parameters  
 NAME AJ12501-5\_001  
 EXPNO 11  
 PROCNO 11

F2 - Acquisition Parameters  
 Date\_ 20010725  
 Time 17.03  
 INSTRUM gpc500  
 PULPROG zgpg30  
 PROBR0 5 mm BBO BB-  
 PROCNO 10000  
 TD 32768  
 SOLVENT CDCl3  
 NS 16  
 DS 4  
 SWH 4316.346 Hz  
 FWHZ 2.10468 Hz  
 EQRES 0.2376180 sec  
 AQ 161.3  
 RG 116.000 usec  
 DE 6.00 usec  
 TE 300.2 K  
 UG 0.0000000 sec  
 O1 1.46231698 sec  
 O2 0.80000001 sec  
 O3 0.0001600 sec

\*\*\*\*\* CHANNEL f1 \*\*\*\*\*  
 NUC1 1H  
 P1 11.75 usec  
 PL1 0.00 dB  
 SFO1 500.1318990 Mhz

F1 - Acquisition parameters  
 N20 256  
 TD 256  
 SFO1 500.1319 Mhz  
 FIDRES 16.837284 Hz  
 F2 8.616 ppm  
 SN

F2 - Processing parameters  
 SI 1024  
 SF 500.1300115 Mhz  
 MDW 0.00000000  
 LS 0.00 Hz  
 GB 0  
 PC 1.00

F1 - Processing parameters  
 SI 1024  
 SF 500.1300115 Mhz  
 MDW 0.00000000  
 LS 0.00 Hz  
 GB 0  
 PC 1.00

2D NMR plot parameters  
 CQ2 25.00 cm  
 CQ1 25.00 cm  
 F2 400.25 Hz  
 F2C 400.25 Hz  
 F2PH1 0.156 ppm  
 F2H1 58.04 Hz  
 F2PLO 8.006 ppm  
 F2LO 400.28 Hz  
 F2PH1 58.04 Hz  
 F2PCH1 0.31242 ppm/cm  
 F2PZCN 156.25000 Hz/cm  
 F2PCHN 0.31242 ppm/cm  
 F2HZCN 156.25000 Hz/cm

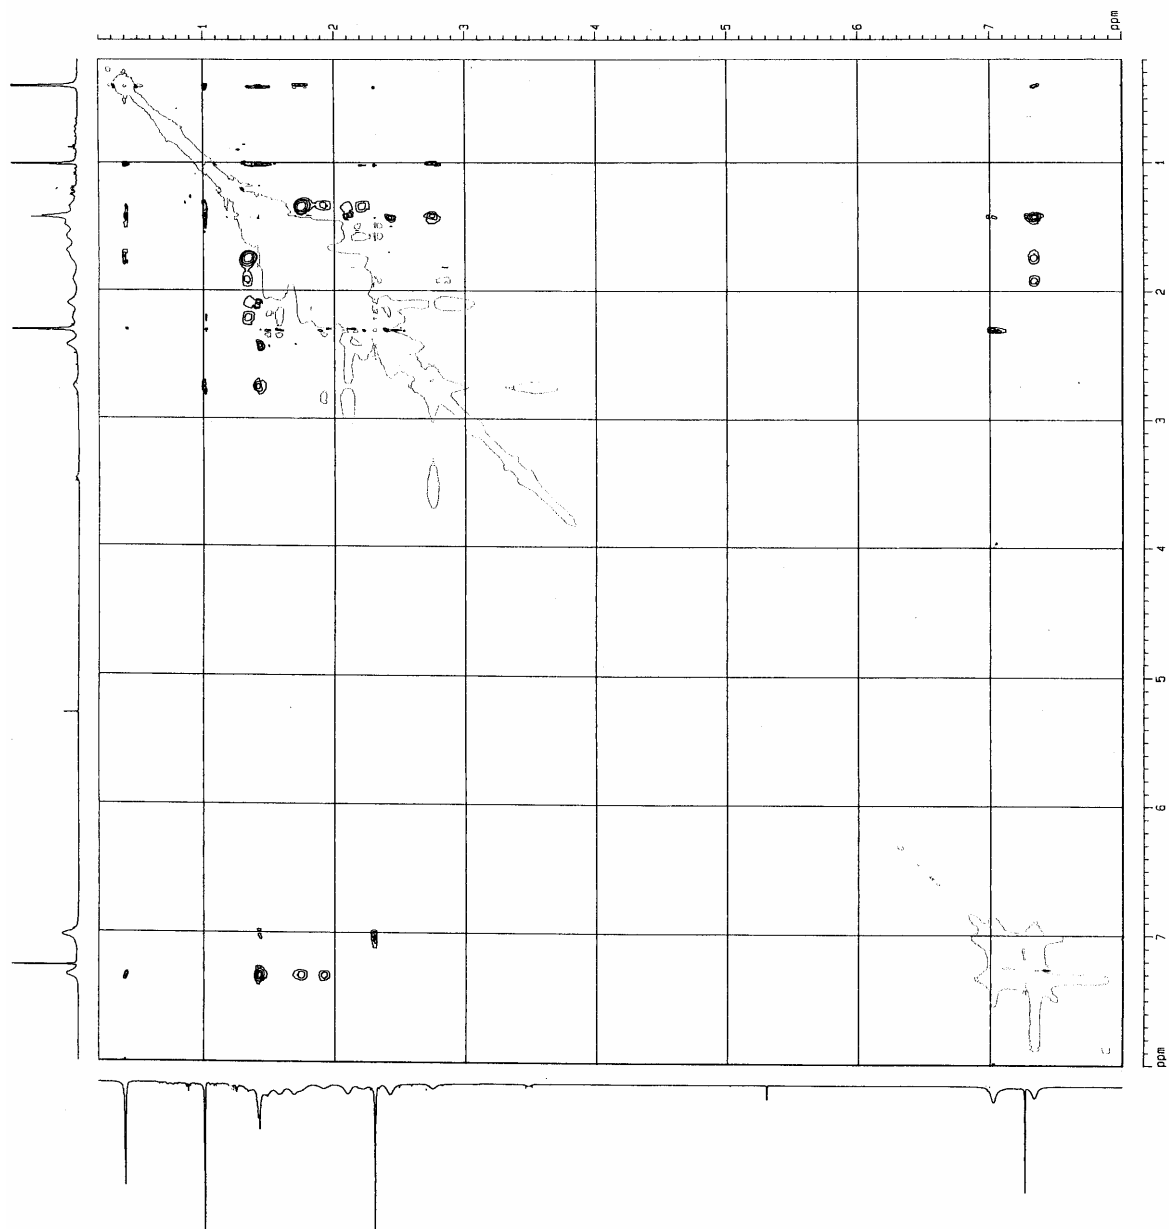

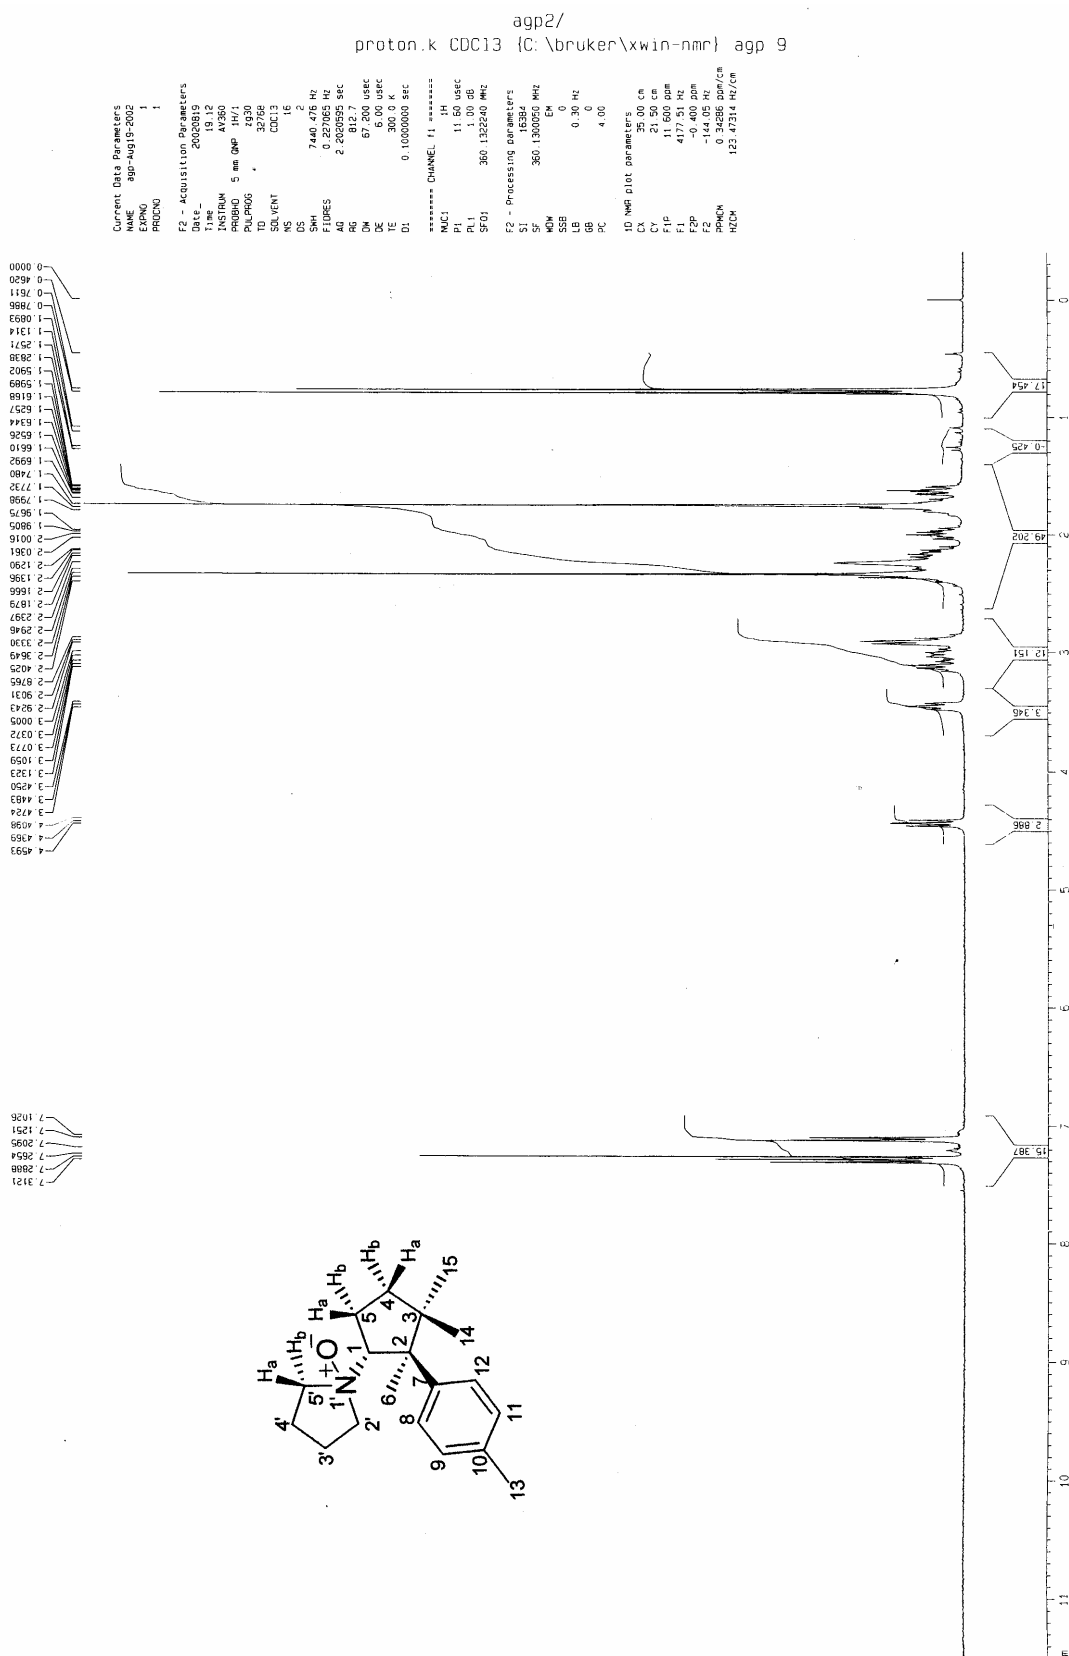

AGP3/206 (P2)

c13cpdno.a3 CDCl3 C: /u jeh 2

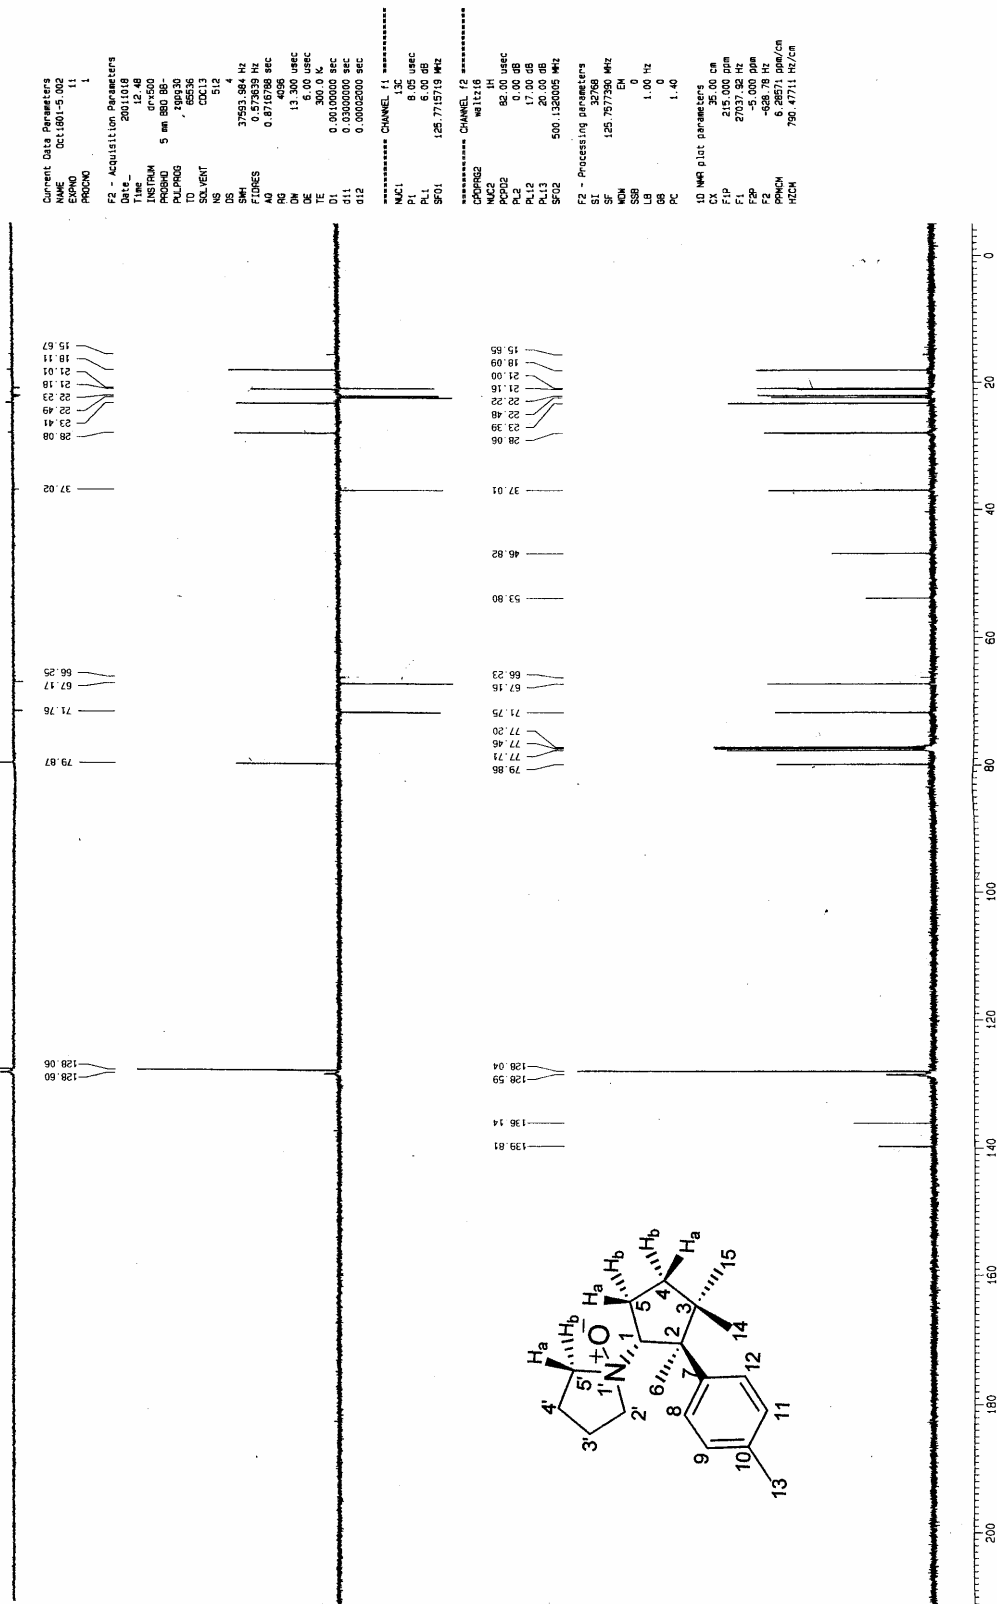

noesy1dsvw\_b3 CDC13 C:/u jeh 2  
 ACP5/305 (P2)

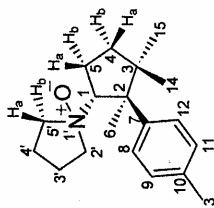

Current Data Parameters  
 NAME OC11801-5\_02  
 EXPNO 23  
 PROCNO 1

F2 - Acquisition Parameters  
 Date\_ 20011018  
 Time 15:53  
 INSTRUM dr5500  
 PULPROG zgpg30  
 TD 65536  
 SOLVENT CDC13  
 NS 8  
 DS 4  
 FIDRES 4.08 Hz  
 AQ 2.19559 Hz  
 RG 32  
 DQ 111.200 usec  
 DE 9.00 usec  
 DD 0.0000300 sec  
 DI 0.9725547 sec  
 DB 0.8000001 sec  
 INE 0.0001120 sec

\*\*\*\*\* CHANNEL f1 \*\*\*\*\*  
 NUC1 1H  
 P1 11.75 usec  
 PL1 0.00 dB  
 SFO1 500.135415 MHz

F1 - Acquisition Parameters  
 NUC2 29Si  
 P2 17.50 usec  
 PL2 0.00 dB  
 SFO2 99.626030 MHz

F2 - Processing parameters  
 SI 1024  
 SF 500.1299980 MHz  
 DSF 128  
 ASFO 2  
 LB 0.00 Hz  
 GB 0  
 PC 1.00

F1 - Processing parameters  
 SI 1024  
 SF 500.1299980 MHz  
 DSF 128  
 ASFO 2  
 LB 0.00 Hz  
 GB 0

2D NMR plot parameters  
 CX2 25.00 cm  
 CY2 25.00 cm  
 FZLO 8.389 ppm  
 FZL0 4195.76 Hz  
 F2PHI -0.601 ppm  
 F2H1 -300.63 Hz  
 F1LO 8.389 ppm  
 F1H1 -30.601 ppm  
 F2PCH0 0.35562 ppm/cm  
 F2H0A 179.85542 Hz/cm  
 F2PCHM 0.35562 ppm/cm  
 F2H0M 179.85542 Hz/cm

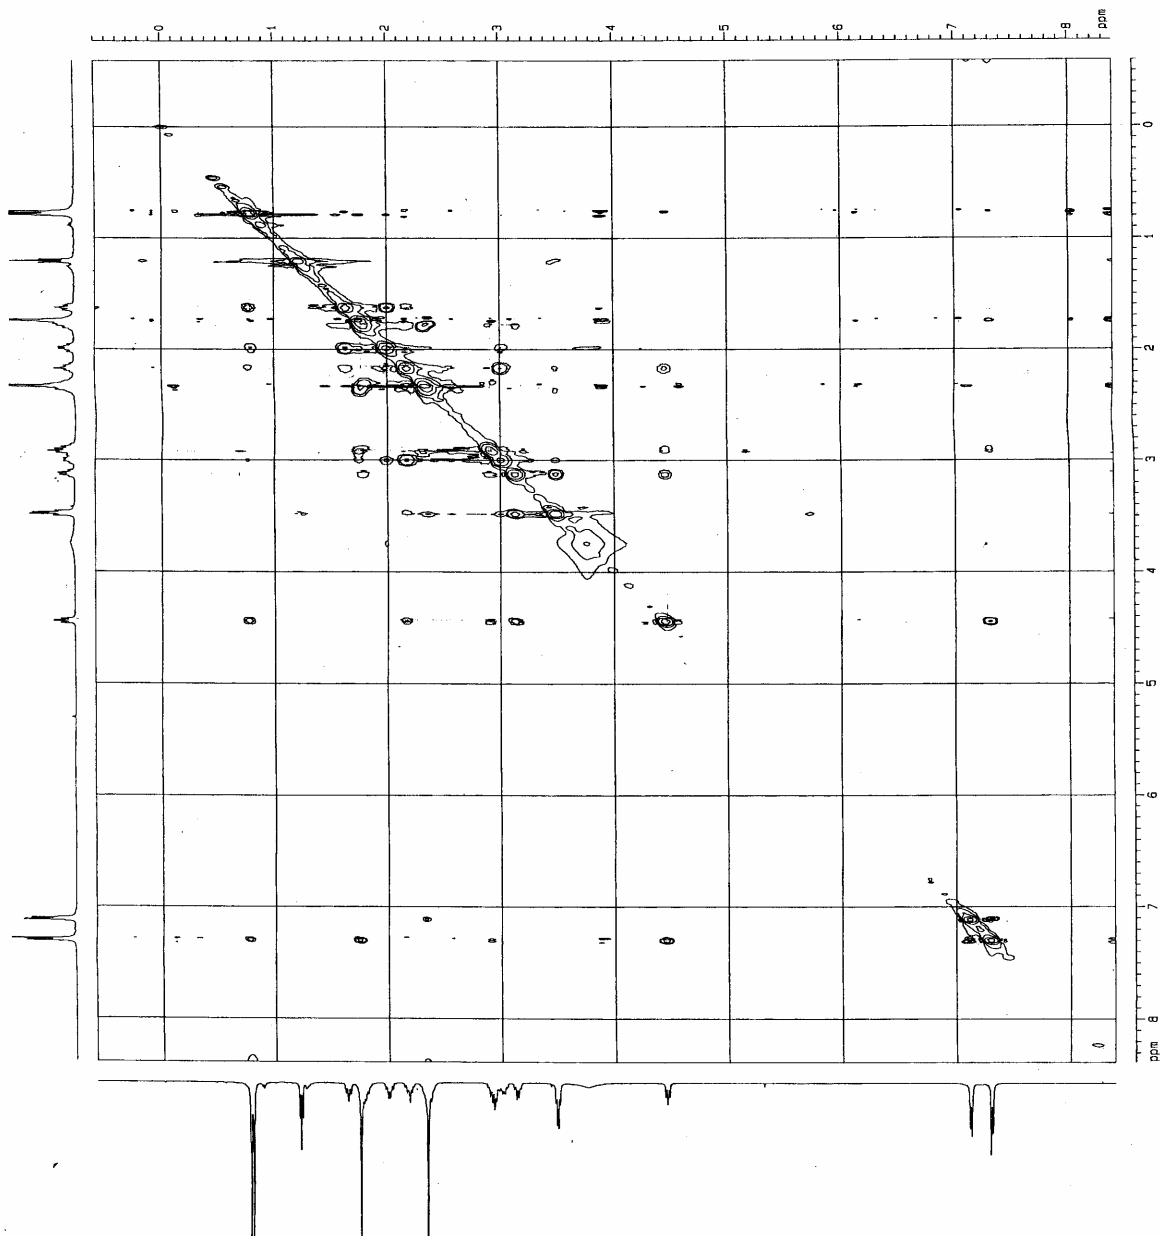

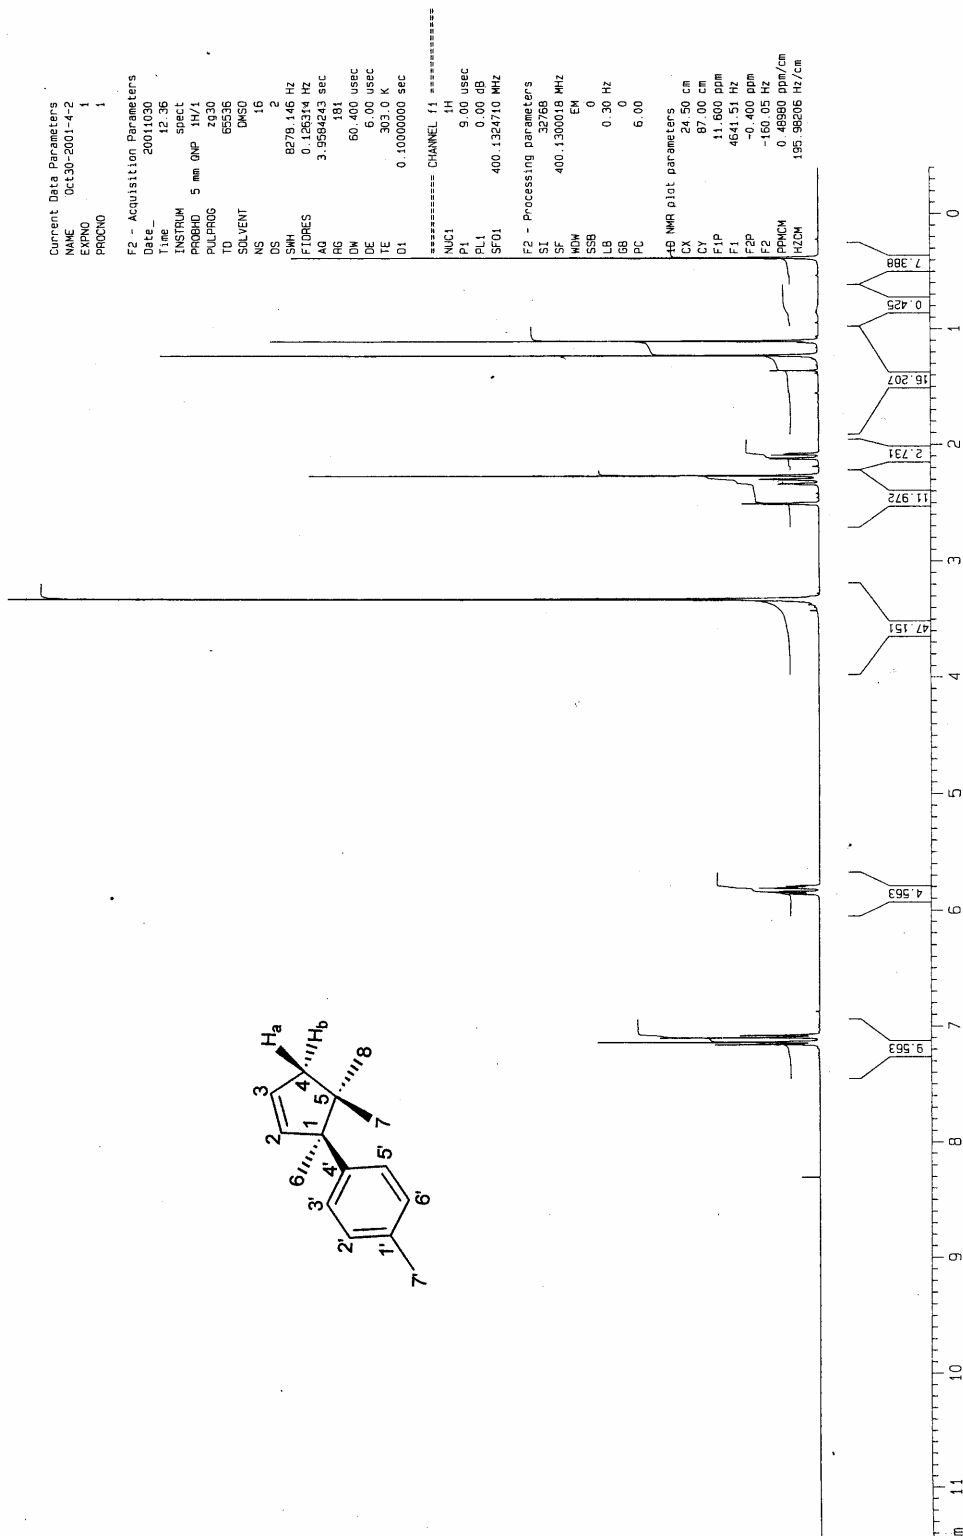





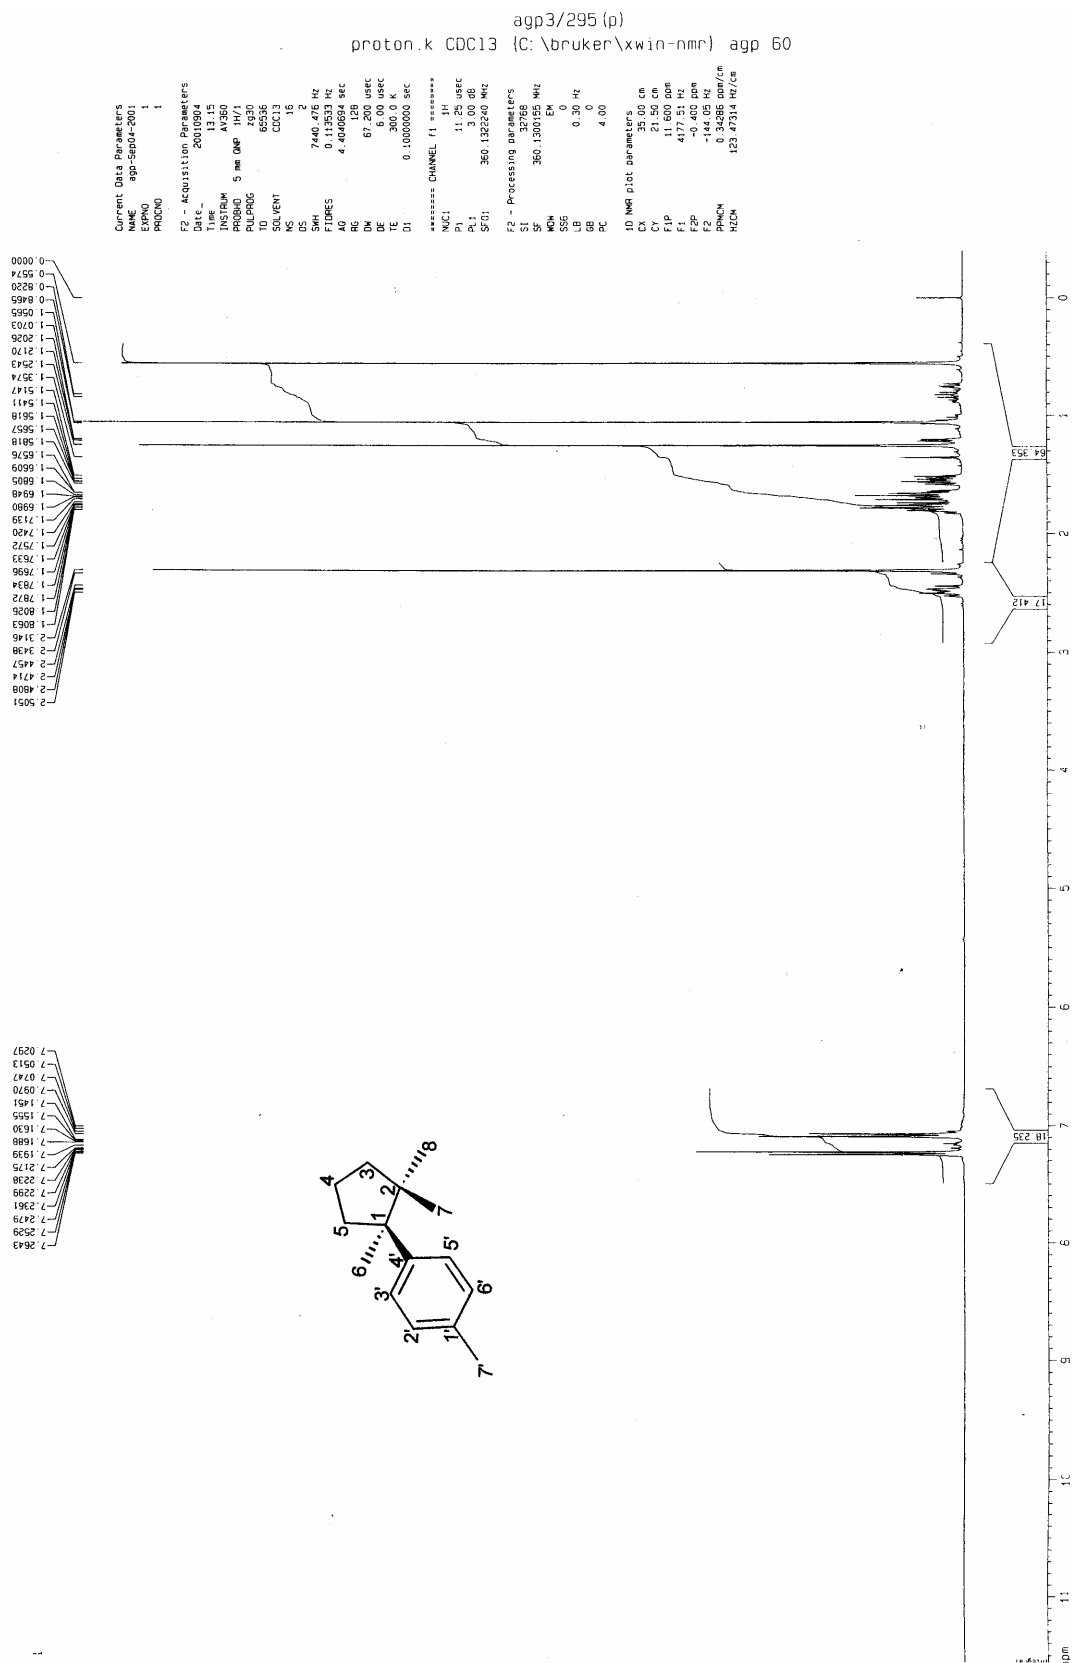

agg3/295 (p)  
 c13cpdno.k CDC13 [C:\bruker\lxwin-nmr} agg 60

```

Current Data Parameters
NAME      agg-Sup04-2001
EXPNO    2
PROCNO   1

F2 - Acquisition Parameters
Date_    20010905
Time     2.41
INSTRUM  AV350
PROBHD   5 mm QNP
PULPROG  zgpg30
TD        65536
SOLVENT  CDCl3
NS        640
DS        4
AQ        0.7173514 Hz
FIDRES   0.1416641 Hz
AQ        1.2059124 SEC
RG        8192
Dw        16.400 usec
DE        6.00 usec
TE        300.2
D1        0.01000000 SEC
d11       0.03000000 SEC
d12       0.00002000 SEC

***** CHANNEL f1 *****
NUC1      13C
P1        3.88 usec
PL1       3.00 dB
SFO1     90.5646660 MHz

***** CHANNEL f2 *****
CPDPRG2   waltz16
NUC2      1H
P2        87.00 usec
PL2       3.00 dB
PL12      22.00 dB
PL13      19.00 dB
SFO2     360.1314405 MHz

F2 - Processing parameters
SI        32768
SF        90.5547250 MHz
WDW       EM
SSB       0
LB        1.00 Hz
GB        0
PC        1.40

1D NMR f1 f2 parameters
CX        35.00 cm
CY        8.70 cm
FIDP      215.000 kbit
F1        19469.27 Hz
F2        360.1314405 MHz
PRDNM     6.289571 cm/Hz
HZCM      569.20111 Hz/cm
    
```

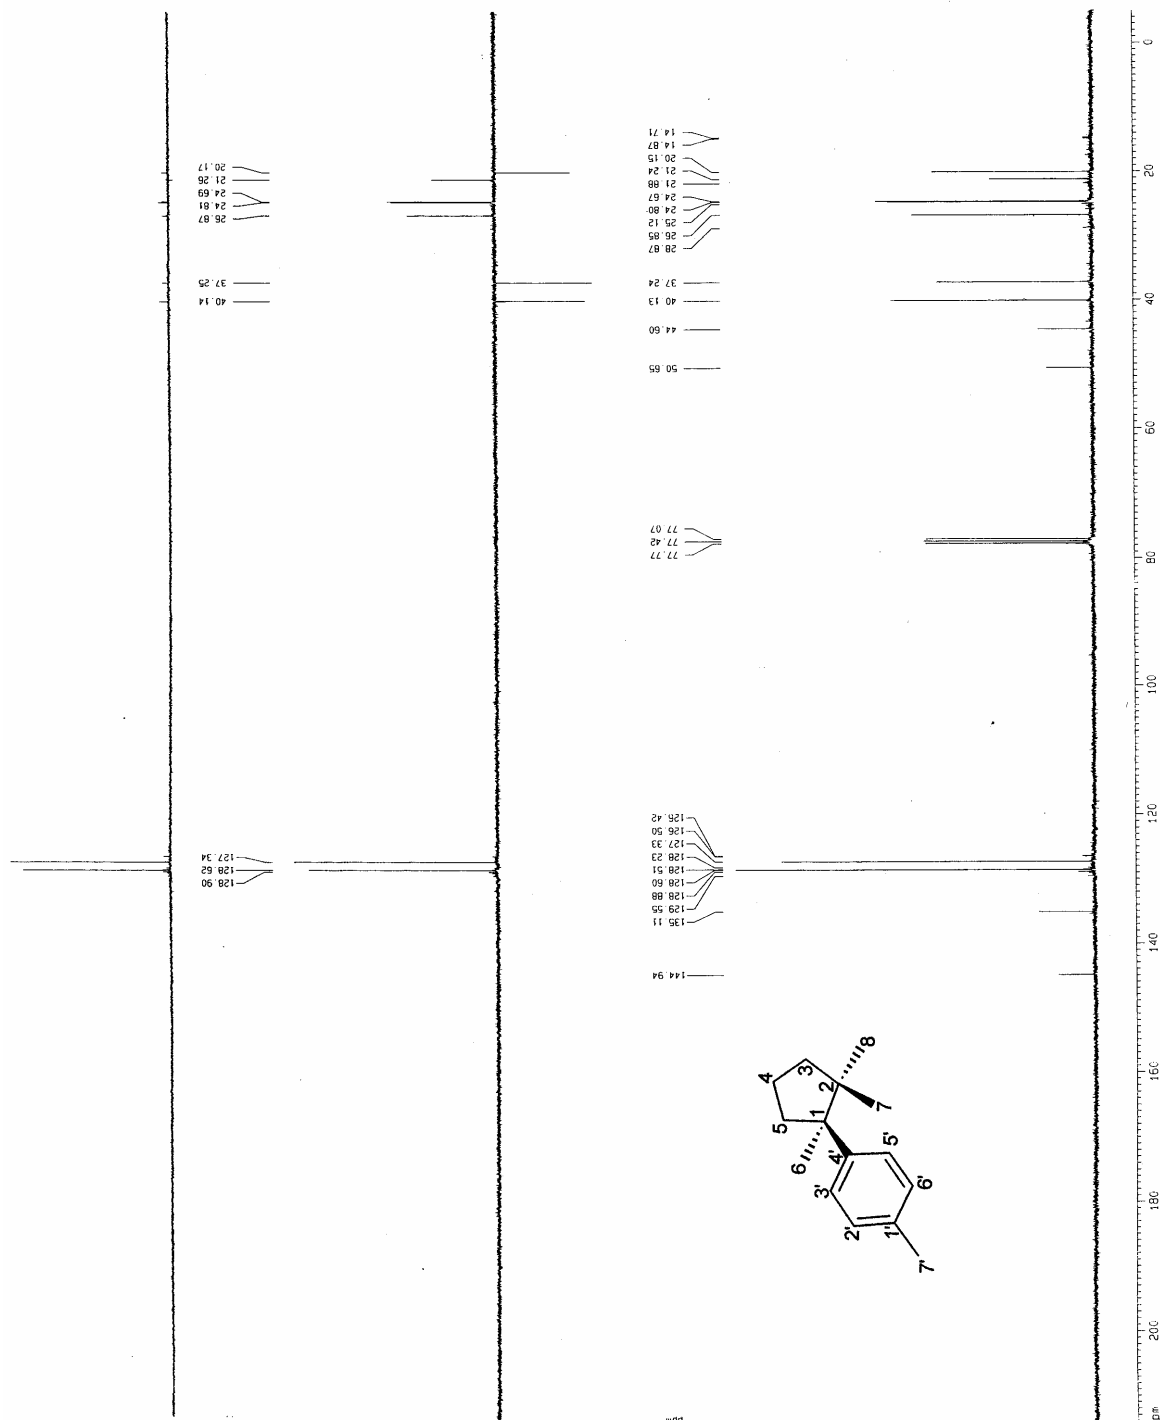

agg3/305 (p)  
 proton.k CDC13 {C:\bruker\xwin-nmr} app 2

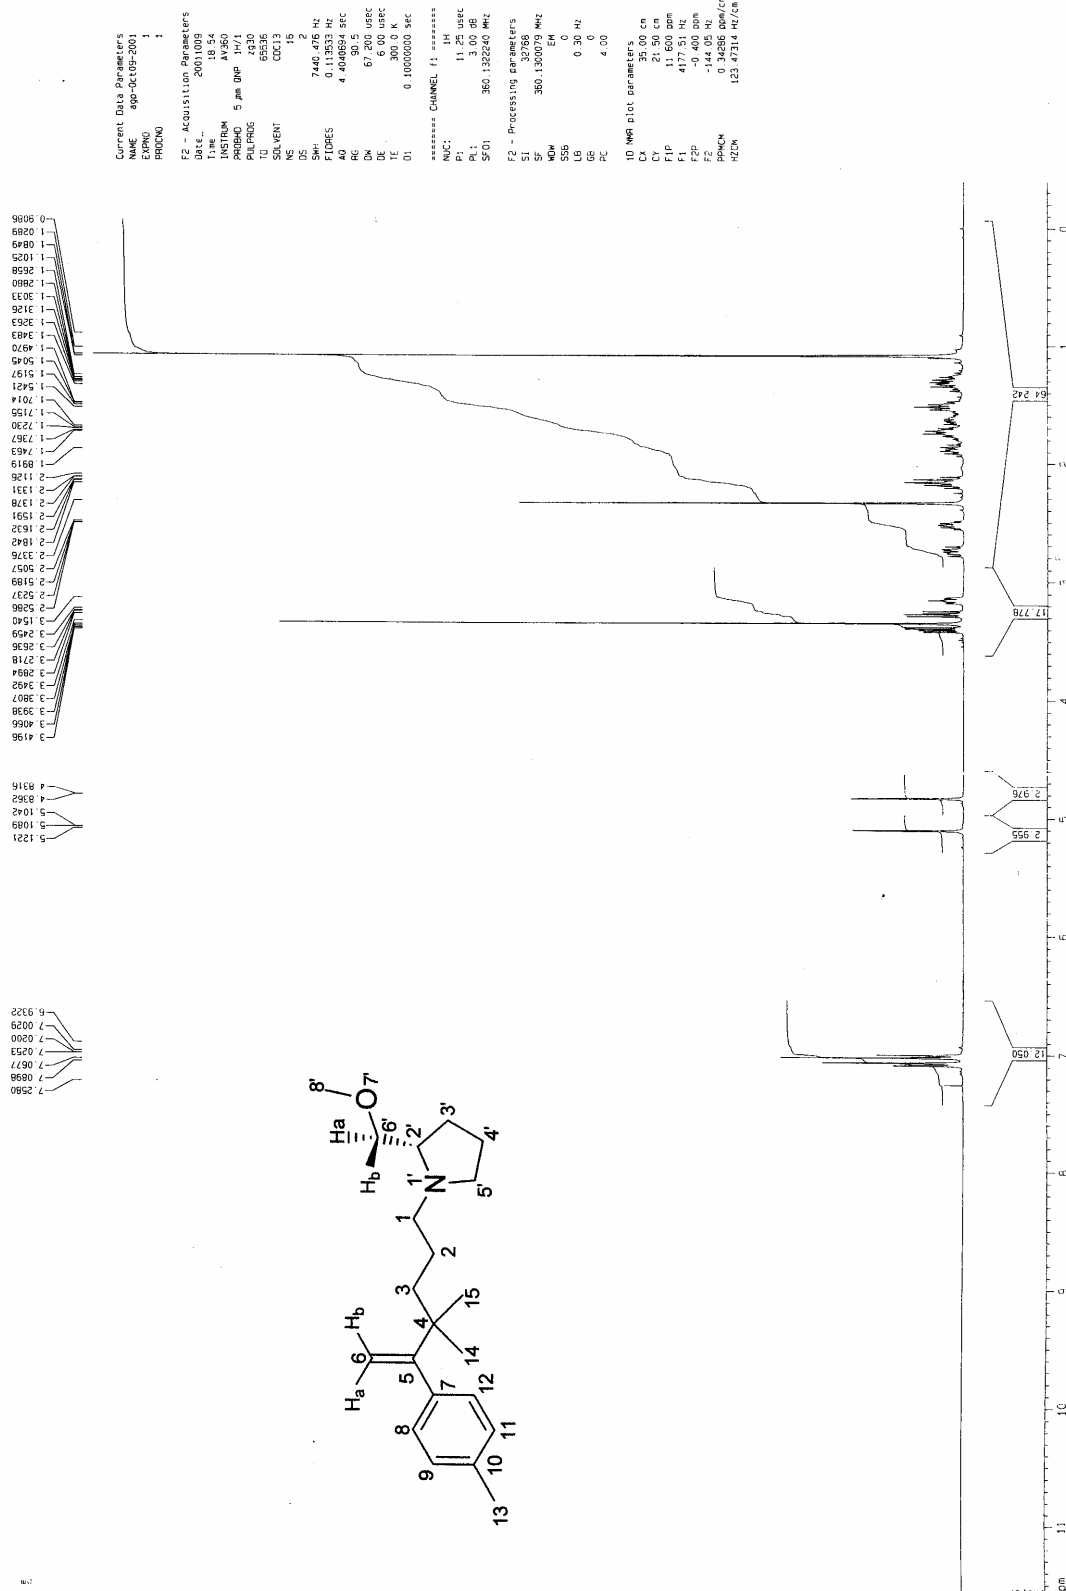

agg3/305 (p)  
 c13cpdno.k CDC13 {C:\bruker\lxwin-nmr} agg 57

Current Data Parameters  
 NAME agg-Ser05-2002  
 EXPNO 6  
 PROCNO 1  
 F2 - Acquisition Parameters  
 Date\_ 20030905  
 Time\_ 0.36  
 INSTRUM AV360  
 PROBHD 5 mm QNP 1H/1  
 PULPROG zgpg30  
 SOLVENT CDC13  
 NS 640  
 DS 4  
 SWH 27173.912 Hz  
 FIDRES 0.1400000 Hz  
 AQ 1.2069124 sec  
 RG 51932.6  
 DM 18.400 usec  
 DE 6.00 usec  
 TE 300.0 K  
 D1 0.03000000 sec  
 D11 0.03000000 sec  
 D12 0.00020000 sec  
 ===== CHANNEL f1 =====  
 NUC1 13C  
 P1 6.50 usec  
 PL1 6.00 dB  
 SFO1 90.5646860 MHz  
 ===== CHANNEL f2 =====  
 CHPROG waltz16  
 NUC2 1H  
 P2 80.00 usec  
 PL2 1.00 dB  
 PL12 17.77 dB  
 PL13 120.00 dB  
 SFO2 360.1314050 MHz  
 F2 - Processing parameters  
 SI 32768  
 SF 90.5647315 MHz  
 DSF 360.1314050 MHz  
 LB 1.00 Hz  
 GB 0  
 PC 1.40  
 SD Mem plot parameters  
 CY 38.00 cm  
 CX 6.70 cm  
 F1 215.000 ppm  
 F2 5.000 ppm  
 F3 5.000 ppm  
 RSKCM 6.29571 ppm/cm  
 RDCM 569.20111 Hz/cm

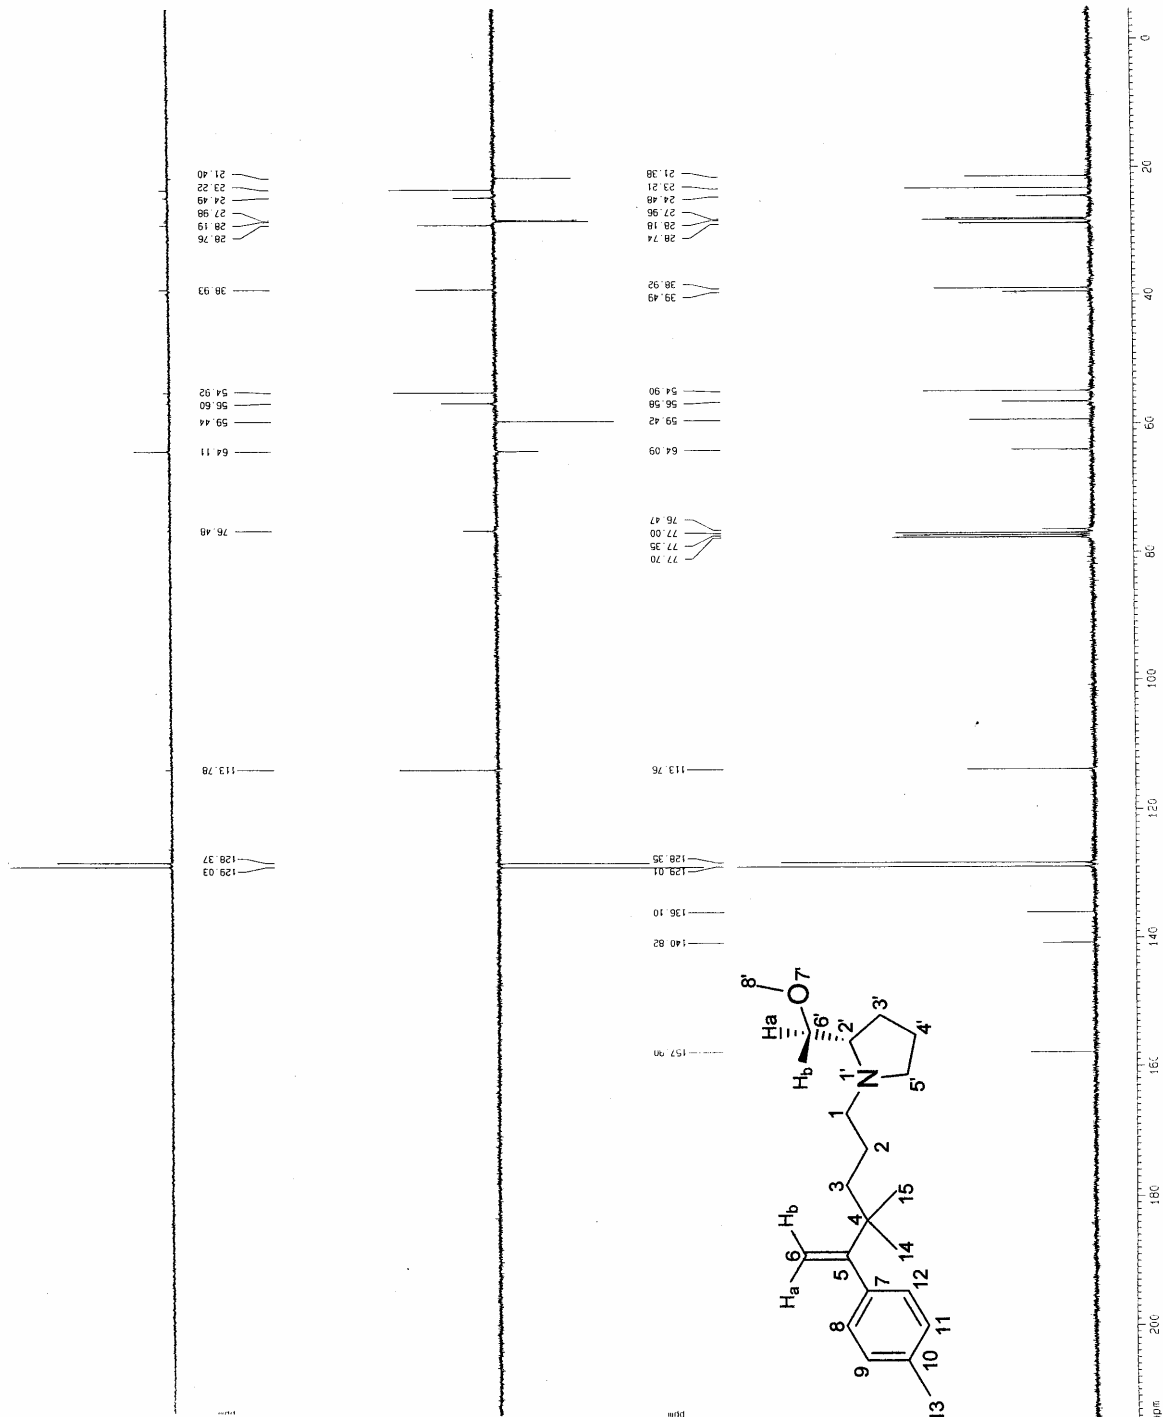

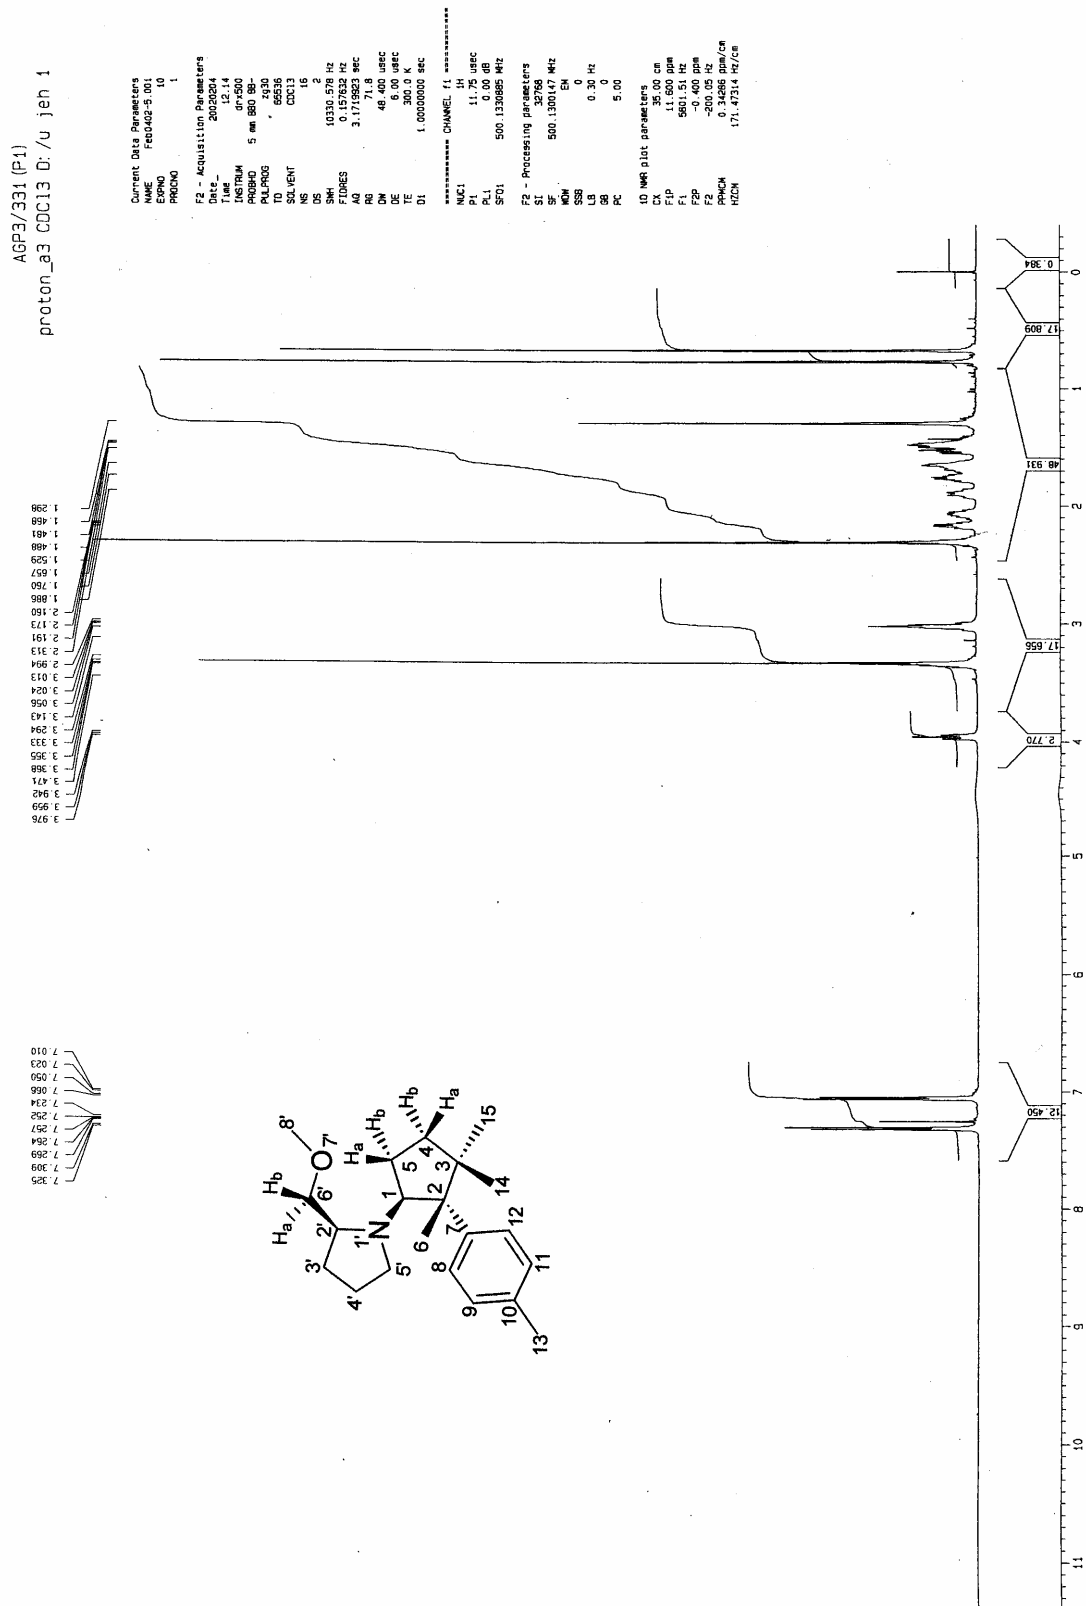

AGP3/331 (F1)  
 c13cpdno.a3 CDC13 D: /u jeh 1

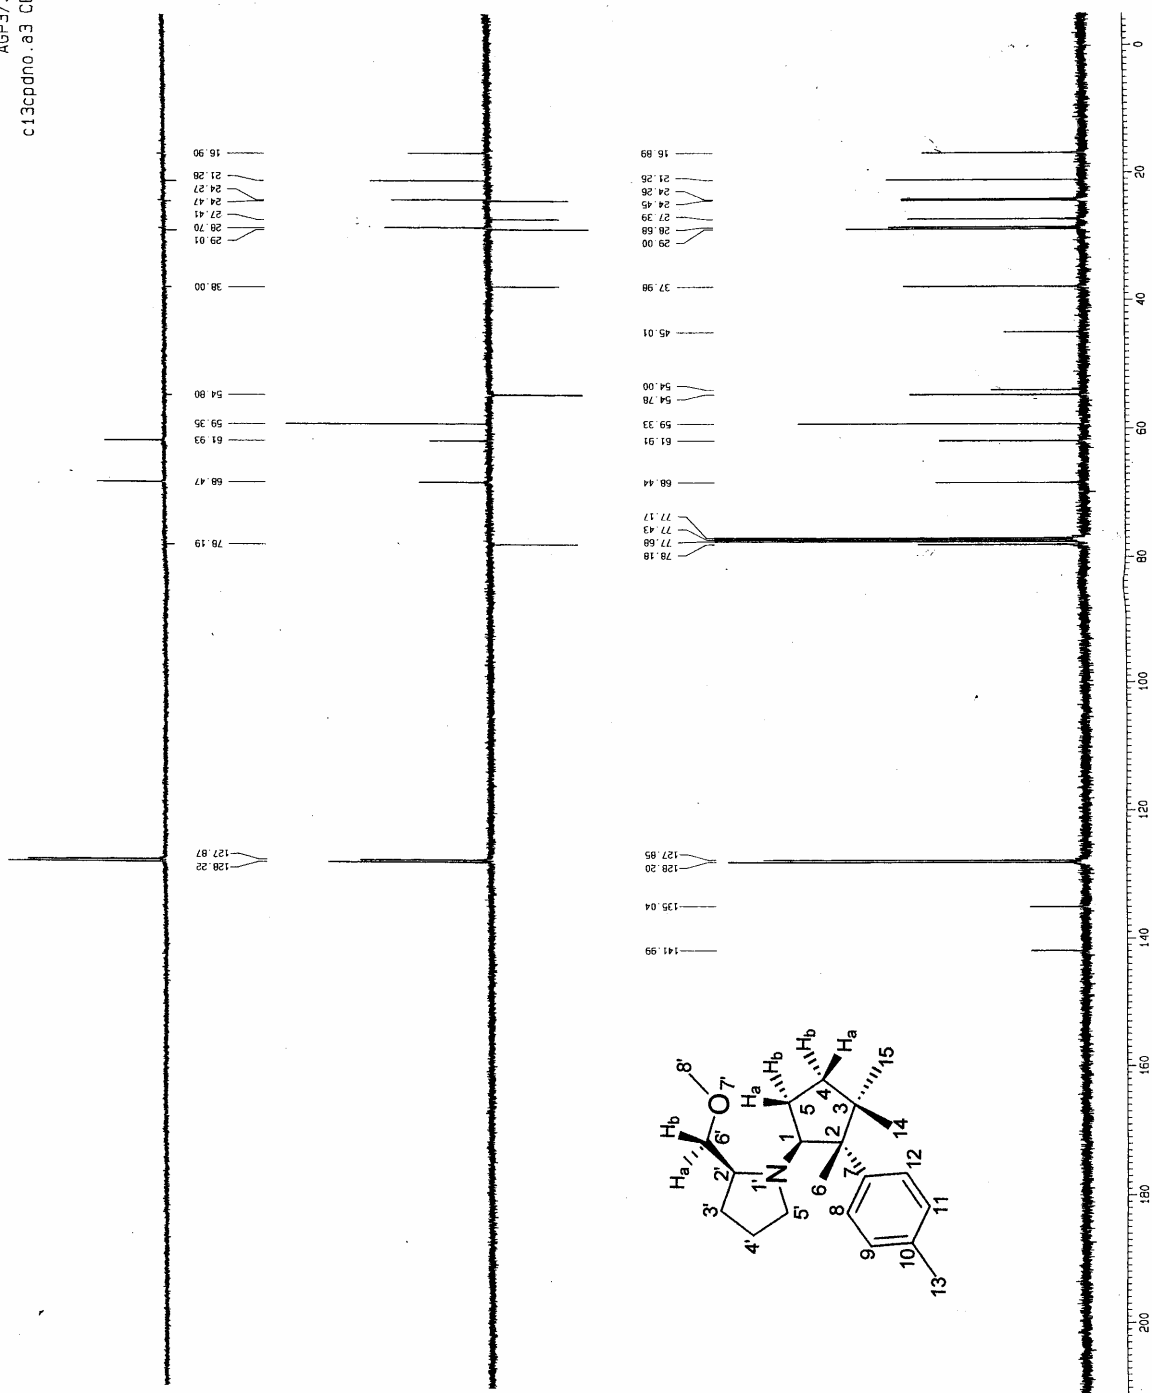





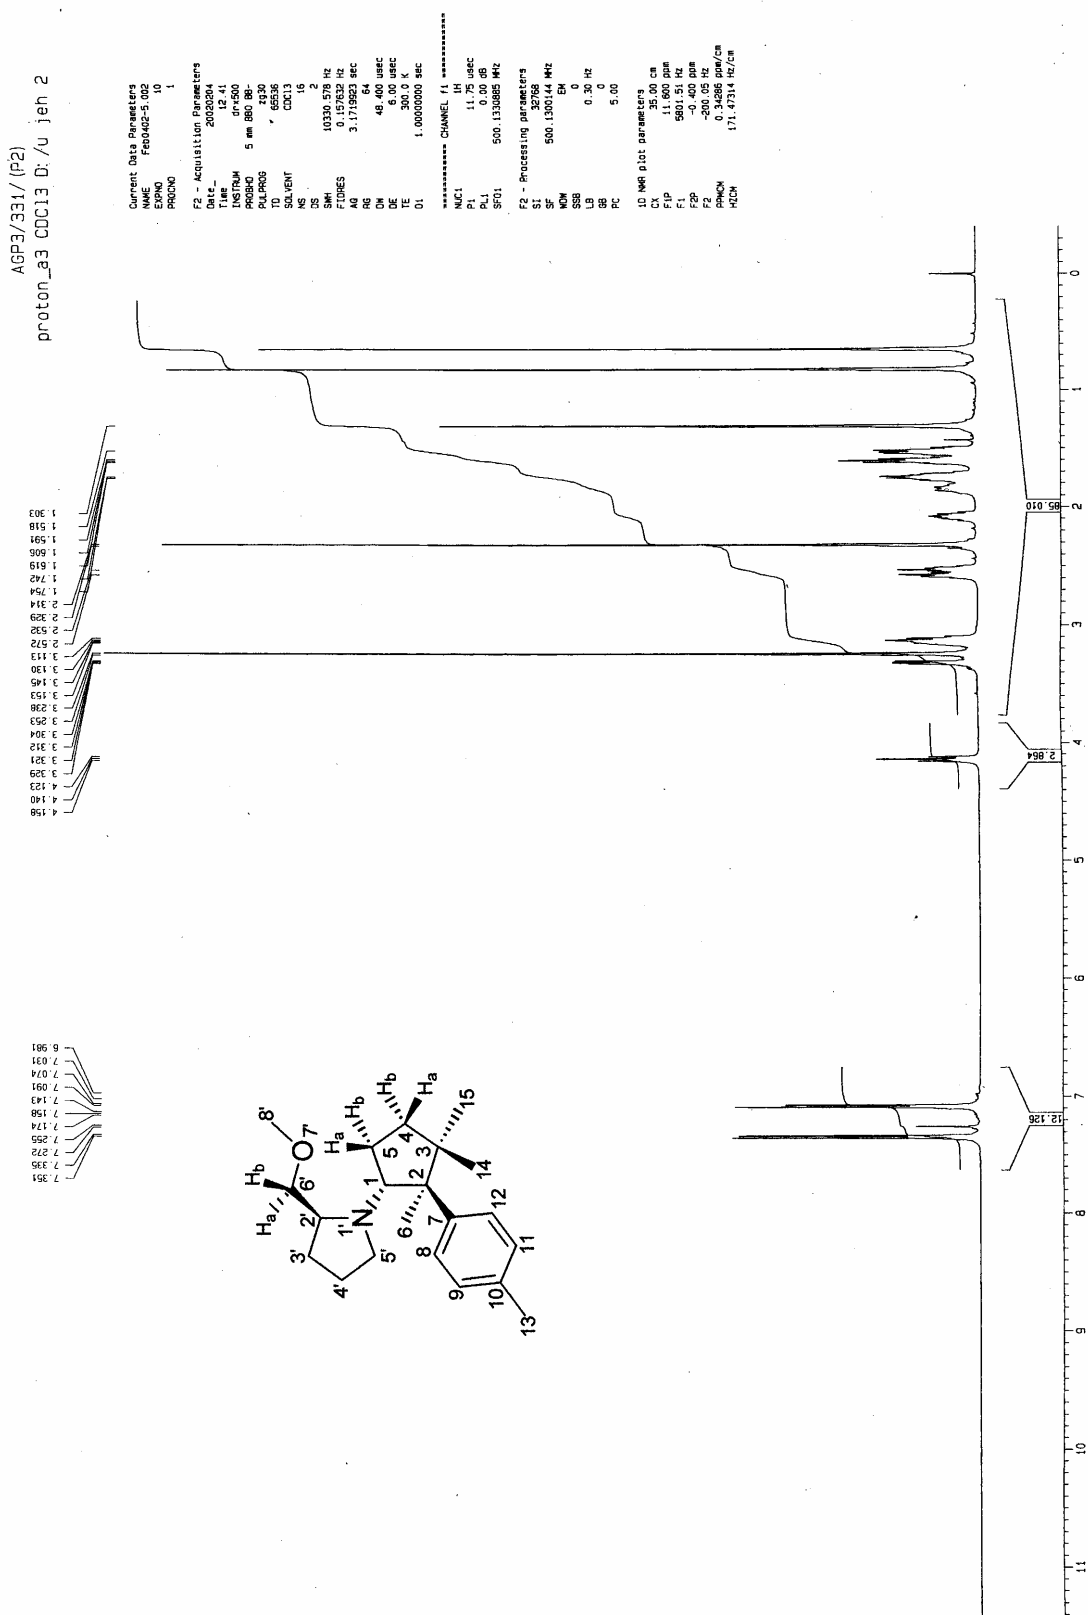

AGP3/331/(P2)  
 c13cpdno.a3 C0C13 D:/u jeh 2

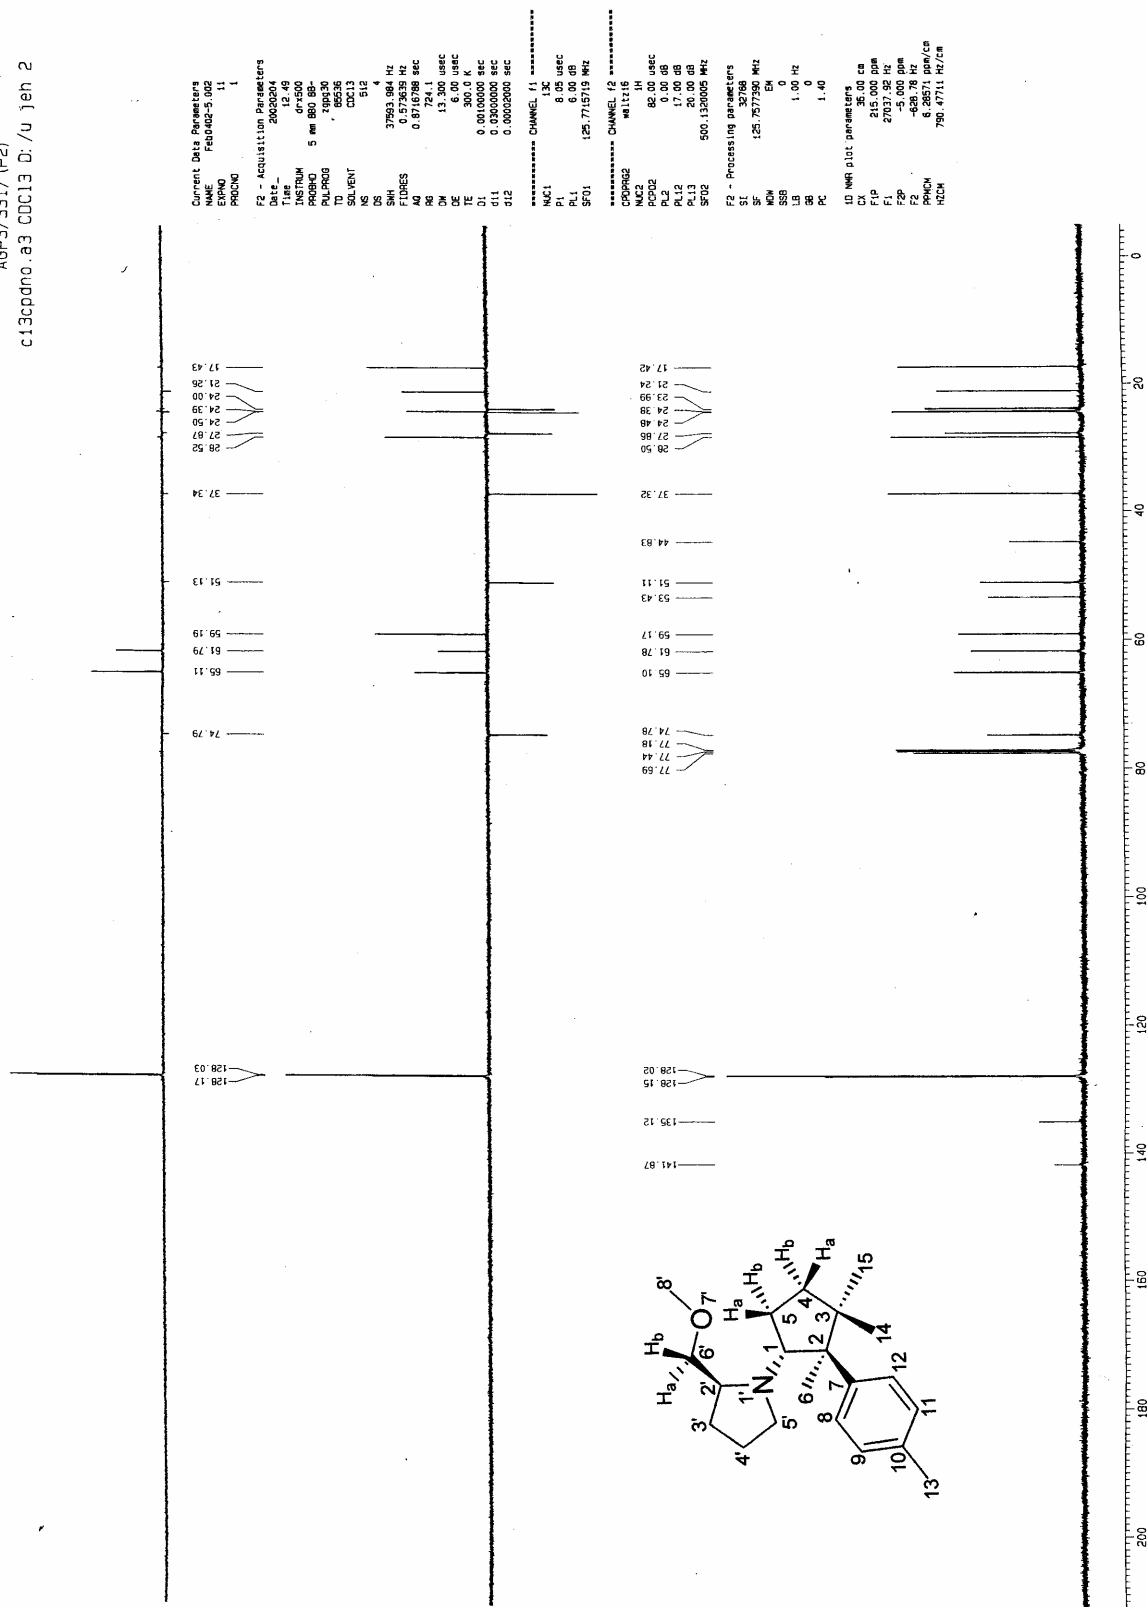

AGP3/  
 NOESYPHSW CDCl3 [C:\N\] General 2

Current Data Parameters  
 NAME Oct18-2001-4-2  
 EXPNO 8  
 PROCNO 1

F2 - Acquisition Parameters  
 Date\_ 20011016  
 Time 17.38  
 INSTRUM spect  
 PULPROG zgpg30  
 TO 2048  
 SOLVENT CDCl3  
 NS 16  
 DS 4  
 SWH 3561.854 Hz  
 FIDRES 1.753984 Hz  
 AQ 0.2851316 sec  
 RG 40.3  
 DM 158.200 umc  
 ZE 30.0 umc  
 DE 30.0 umc  
 DQ 0.0000300 sec  
 O1 1.98600284 sec  
 DB 0.80000001 sec  
 JAW 0.00227840 sec  
 JMOD 0.00000000 sec  
 MCHRG 0.00000000 sec  
 MCKEY 0.98300140 sec  
 STOUT 45

\*\*\*\*\* CHANNEL f1 \*\*\*\*\*  
 NUC1 1H  
 P1 8.00 umc  
 PL1 0.00 dB  
 SFO1 400.1314308 MHz

F1 - Acquisition Parameters  
 NU0 256  
 TD 256  
 SFO1 400.1314 MHz  
 FIDRES 14.031071 Hz  
 SW 8.977 ppm

F2 - Processing Parameters  
 SI 1024  
 SF 400.1300467 MHz  
 MTK 2  
 SSB 2  
 GB 0  
 PC 1.00

F1 - Processing Parameters  
 SI 1024  
 SF 400.1300467 MHz  
 MTK 2  
 SSB 2  
 GB 0

2D NMR plot parameters  
 CX2 15.00 cm  
 CX1 15.00 cm  
 F2FLO 7.500 ppm  
 F2FID 300.44 Hz  
 F2FRI 0.500 ppm  
 F2FRL 130.04 Hz  
 F1FLO 7.500 ppm  
 F1FID 300.44 Hz  
 F1FRI 15.000 ppm  
 F1FRL 0.40058 ppm/cm  
 F2PACH 192.28578 Hz/cm  
 F1PACH 0.48058 ppm/cm  
 F2HZON 192.28578 Hz/cm  
 F1HZON

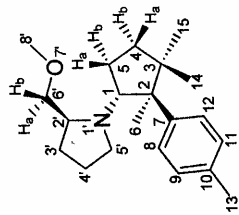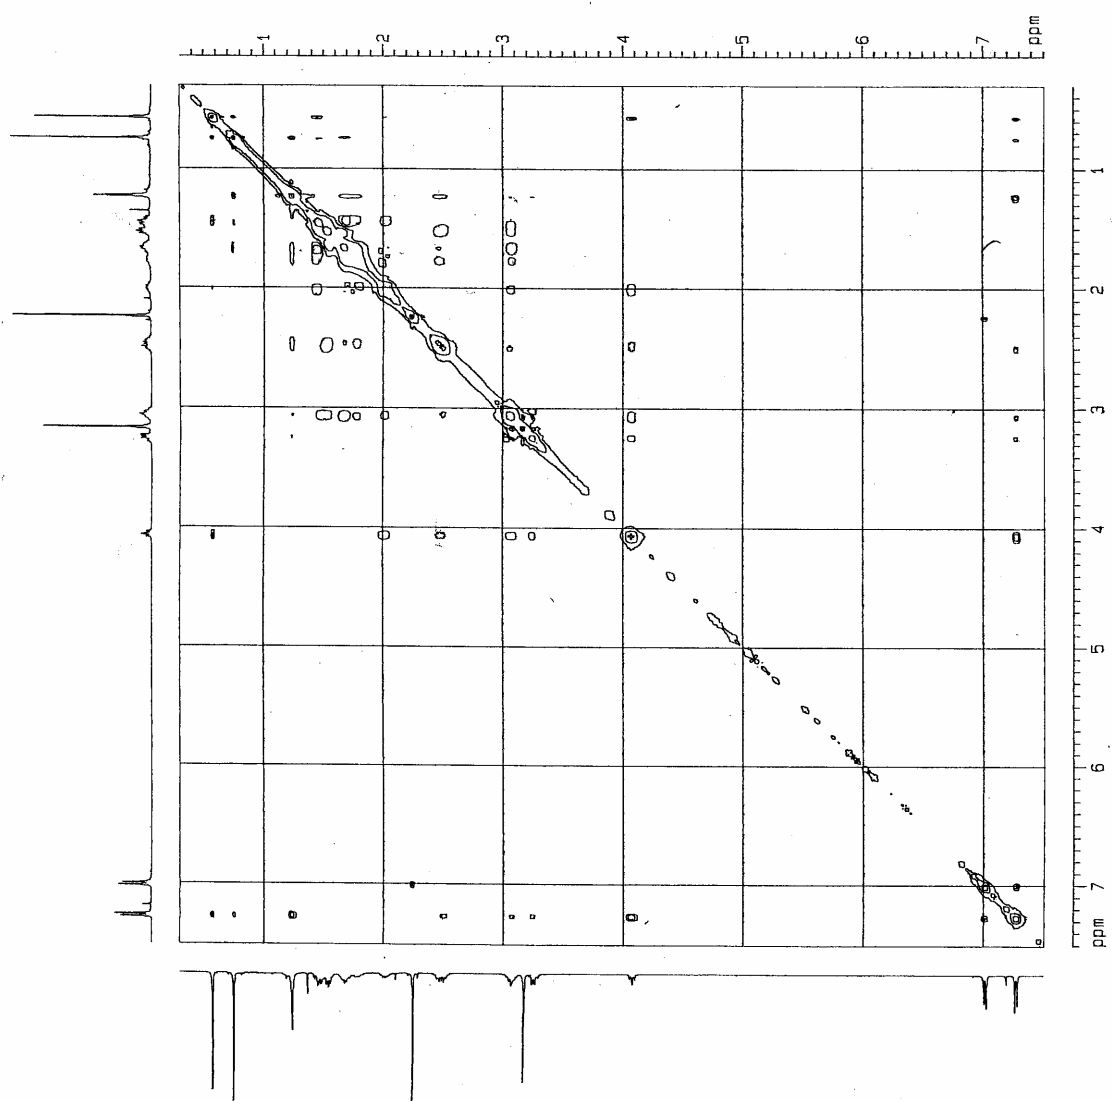

Supplement: b300815k.pdf [file b300815k.pdf]
